## 1 **Two classes of active transcription sites and their roles in developmental regulation**

2 Sarah Robinson-Thiewes<sup>1</sup>, John McCloskey<sup>2</sup>, and Judith Kimble<sup>1,2</sup>

3 Affiliations: <sup>1</sup>University of Wisconsin-Madison, Department of Genetics; <sup>2</sup>University of Wisconsin-  
4 Madison, Department of Biochemistry

5

### 6 **Abstract**

7 Genes encoding powerful developmental regulators are exquisitely controlled, often at multiple levels.  
8 Here, we use single molecule FISH (smFISH) to investigate nuclear active transcription sites (ATS) and  
9 cytoplasmic mRNAs of three key regulatory genes along the *C. elegans* germline developmental axis.  
10 The genes encode ERK/MAP kinase and core components of the Notch-dependent transcription  
11 complex. Using differentially-labeled probes spanning either a long first intron or downstream exons, we  
12 identify two ATS classes that differ in transcriptional progression: iATS harbor partial nascent transcripts  
13 while cATS harbor full-length nascent transcripts. Remarkably, the frequencies of iATS and cATS are  
14 patterned along the germline axis in a gene-, stage- and sex-specific manner. Moreover, regions with  
15 more frequent iATS make fewer full-length nascent transcripts and mRNAs, whereas those with more  
16 frequent cATS produce more of them. We propose that the regulated balance of these two ATS classes  
17 has a major impact on transcriptional output during development.

18

19

### 20 **Introduction**

21 The control of gene expression is central to animal development and homeostasis. To achieve that  
22 control, an increasingly complex choreography of regulatory steps dictates when, where, and how much  
23 mRNA is produced. Transcriptional initiation has taken center stage as the key step in regulating gene  
24 expression for years (Mannervik et al., 1999), but other downstream mechanisms have now joined  
25 initiation on that stage. Most relevant to this work is regulation of transcriptional progression. A classic  
26 example of regulation at this step occurs in *Drosophila* embryos, where the cell cycle is too short to  
27 complete transcription through unusually long Hox genes before the cell divides (Gubb, 1986; Shermoen  
28 and O'Farrell, 1991). A more broadly used mechanism is the regulated release from transcriptional  
29 pauses that occur ~20-60 bp after initiation, the "promoter-proximal pause" (Adelman and Lis, 2012).  
30 Transcriptional progression can be deduced with "-omic" methods, such as PRO-seq or NET-seq  
31 (Churchman and Weissman, 2011; Jonkers and Lis, 2015), or with imaging methods, such as single  
32 molecule fluorescence *in situ* hybridization (smFISH) or live-imaging (Pichon et al., 2018). One  
33 advantage of smFISH is that transcription of endogenous genes can be followed in their native context  
34 with single cell and single molecule resolution. Although this work began with an smFISH investigation  
35 of active transcription sites (ATS) and transcriptional yields at key regulatory genes during development,  
36 it led to discovery of two distinct ATS classes and what we propose is a case of regulated transcriptional  
37 progression.

38 Our studies have been conducted in the adult *C. elegans* gonad, which is well-suited to smFISH (e.g.  
39 Lee et al., 2016) and where germ cell development occurs linearly along the distal-proximal axis.  
40 Germline stem cells (GSCs) reside within their niche at the distal end and GSC daughters mature  
41 progressively toward gametogenesis as they move from the niche and ultimately reach the other end  
42 (Figure 1A). Previous studies in this tissue revealed a gradient of Notch-dependent transcriptional bursts  
43 at the Notch target gene, *sygl-1* (Crittenden et al., 2019; Lee et al., 2019, 2016). Here, we focus on  
44 transcription of three other genes that regulate GSC self-renewal or differentiation (Figure 1B). The *lag-*  
45 *1* and *lag-3* genes encode core components of the Notch transcriptional activation complex, which

46 promotes GSC self-renewal in response to signaling from the niche (Christensen et al., 1996; Lambie and  
47 Kimble, 1991; Petcherski and Kimble, 2000). The *mpk-1* gene encodes ERK/MAP kinase (Lackner et al.,  
48 1994; Wu and Han, 1994), which promotes several aspects of germline differentiation: sperm/oocyte  
49 fate specification (Min Ho Lee et al., 2007; Morgan et al., 2013), progression through meiotic prophase,  
50 and oogenesis (Arur et al., 2011; Church et al., 1995; Lopez 3rd et al., 2013). We emphasize that our  
51 approach queries transcription at endogenous genes in wildtype animals; our results therefore avoid  
52 potentially confounding effects of transgenes, inserted tags, and reporter constructs.

53 To obtain a high resolution and quantitative view of transcription during development, we coupled  
54 smFISH with a MATLAB image analysis code to score RNAs with 3D resolution in the germline tissue, as  
55 done previously for *sygl-1* (Crittenden et al., 2019; Lee et al., 2016). Using differentially labeled probe  
56 sets to either the 5' half to two-thirds of each gene (spanning the long first intron) or the remaining 3'  
57 part (the exons, most of which are 3' to the intron), we found two distinct ATS classes that differ in  
58 transcriptional progression. One class, iATS for "incomplete" ATS, harbors partial nascent transcripts;  
59 the other class, cATS for "complete" ATS, harbors full length nascent transcripts. Remarkably, the  
60 frequencies of these ATS classes are gene-, position- and sex-specific, suggesting developmental  
61 regulation. Most strikingly, iATS and cATS frequencies are reciprocally graded for two genes in the stem  
62 cell region, in a manner consistent with the graded expression of those genes. We propose that  
63 regulated changes in transcriptional progression, inferred from changes in the frequency of ATS class,  
64 drives the developmental expression of these genes.

65

## 66 RESULTS

### 67 *Experimental design and a modified MATLAB code*

68 Our experimental design took advantage of the simple architecture of the *C. elegans* adult germline  
69 (Figure 1A), the ability to visualize transcription at high resolution in this tissue using smFISH (Crittenden  
70 et al., 2019; Lee et al., 2016), and genes with long first introns that encode key regulators of germline  
71 development (Figure 1B). The *mpk-1*, *lag-1*, and *lag-3* first introns are 8.2 kb, 6 kb, and 8.5 kb,  
72 respectively. We used Stellaris® Probe Designer to create two probe sets for each gene, spanning either  
73 the long first intron and thus covering the 5' half to two-thirds of each gene or all exons and thus  
74 covering the remaining 3' part of the gene (Figure 1C-E). Each set included 47-48 individual probes (see  
75 Table S1 for details). The intron and exon probe sets were labeled with different fluorophores to  
76 generate distinct signals (Figure 2A-C; Figure S1A; S2A; S3A). Probe specificities were confirmed by  
77 inhibiting transcription with  $\alpha$ -amanitin to ensure detection of RNA rather than DNA (Figure S1B; S2B;  
78 S3B); intron-specific deletions to ensure specificity of the intron probe signal (*mpk-1* and *lag-3* only, an  
79 analogous *lag-1* deletion could not be isolated) (Figure S1C, S3C); and a frame-shift mutant (*mpk-1*) or  
80 RNAi (*lag-1*, *lag-3*) to ensure specificity of the exon probe signal (Figure S1D, S2C-D, S3D-E). See Figure  
81 S1-3 legends for gene-specific details of these specificity assays.

82 A previously published MATLAB code (used to analyze *sygl-1* transcription in the *C. elegans*  
83 progenitor zone) defined ATS as nuclear spots with overlapping exon and intron probe signals (Lee et al.,  
84 2016). However, a preliminary inspection by eye of the smFISH images for *mpk-1*, *lag-1*, and *lag-3*  
85 transcripts revealed two types of nuclear spots, both with morphology and size of an ATS. We categorize  
86 these two types as "cATS" and "iATS" (Figure 2D). cATS are detected with overlapping signals from the  
87 exon and intron probe sets, while iATS are detected uniquely with the intron probe set. The finding of  
88 these two ATS types caused us to modify the original code. Briefly, the new code detects nuclear signals  
89 independently for the exon and intron probe sets, it determines if the two signals are overlapping to  
90 assign them as cATS or iATS, and it identifies cytoplasmic mRNA, all within the 3D gonad (Figure S4, see  
91 Methods). During this code revision, we asked how many nuclear spots were seen with each probe set,

92 without taking into consideration any overlap, and found that the intron probe detected more spots  
93 than the exon probe for all three genes (Figure 2E). To test whether the abundance bias of intron spots  
94 might reflect fluorophore differences, we tested *mpk-1* probe sets with swapped fluorophores, but the  
95 intron spot abundance bias did not change (Figure 2E). To validate our modified MATLAB code, we  
96 tested it by rescoring previously published images of *sygl-1* smFISH and obtained results equivalent to  
97 previous report (Figure S5) (Lee et al., 2016). The new code thus scores cATS and iATS with spatial  
98 resolution.

### 99 **Transcriptional probabilities and yields in the progenitor zone**

100 We analyzed *mpk-1*, *lag-1*, and *lag-3* transcription in the adult hermaphrodite progenitor zone (PZ),  
101 where GSCs reside distally and more proximal GSC daughters become primed for differentiation  
102 (Cinquin et al., 2010; Crittenden et al., 2006; Rosu and Cohen-Fix, 2017). Position within the PZ was  
103 scored as the number of germ cell diameters (gcd) or “rows” along the distal-proximal axis from the  
104 distal end, by convention. For this study, we focused on the distal-most 12 rows of the PZ, a region with  
105 roughly 150 germ cells that divide asynchronously every ~6 hrs on average (Albert Hubbard and Schedl,  
106 2019) and move proximally at a rate of ~0.4 to 1 row per hour (Rosu and Cohen-Fix, 2017). Importantly,  
107 a germ cell’s state — naïve and stem cell-like or triggered to differentiate — corresponds to its position  
108 along the axis (Figure 3A).

109 We first determined the percentage of germ cells harboring any ATS, cell row by cell row along the  
110 PZ developmental axis. The ATS scored in this initial analysis include both cATS and iATS, and thus reveal  
111 genes that have not only initiated transcription but also elongated far enough for detection with smFISH  
112 probes. The percentage of cells with any ATS therefore provides a measure of transcriptional  
113 probability, as established previously (Chubb et al., 2006; Lee et al., 2019, 2016). The *mpk-1*, *lag-1*, and  
114 *lag-3* genes were all transcribed actively across the distal PZ with 60 to 70% of cells possessing either a  
115 cATS or iATS (Figure 3B; Figure S6A-C). For comparison, the Notch-activated *sygl-1* gene produces ATS in  
116 ~65% of the distal germ cells within the niche but <5% outside the niche, as previously reported (Lee et  
117 al., 2016) and confirmed here (Figure S5B). We also scored how many individual ATS were seen in each  
118 nucleus as a function of position along the axis. As expected for genes that transcribe in bursts within an  
119 actively dividing cell population, the numbers of individual ATS per cell varied between zero and four  
120 (Figure S6D-F). The higher percentage in the most distal germ cells for *lag-1* ATS and lower percentage in  
121 the same region for *lag-3* ATS are reproducible but not understood. Most importantly, all three genes  
122 are actively engaged in transcription across the distal PZ.

123 We next scored two measures of transcriptional productivity as a function of position in the PZ—the  
124 number of nascent transcripts at cATS (Figure 3C, Figure S6G-I) and number of mRNAs in the cytoplasm  
125 (Figure 3D, S6J-O). Measurement of nascent transcript abundance was limited to cATS, because it could  
126 be estimated by comparing intensity values of exon probe spots at cATS in the nucleus and exon probe  
127 dots at single mRNAs in the cytoplasm. While this strategy misses nascent transcripts at iATS, the  
128 compared values rely on the same probe, same fluorophore, and same image. Both the number of *mpk-*  
129 *1* and *lag-3* nascent transcripts increased steadily as germ cells moved along the PZ axis, while the  
130 number of *lag-1* nascent transcripts increased initially and then leveled off (Figure 3C). Following those  
131 trends, *mpk-1* and *lag-3* mRNA numbers also increased along the axis, while numbers of *lag-1* mRNAs  
132 were more level (Figure 3D). The pattern of *lag-1* mRNA abundance conforms for the most part with an  
133 independent report published recently (Chen et al., 2020). Most strikingly, the nearly uniform  
134 transcriptional probabilities for *mpk-1* and *lag-3* (Fig 3B) did not match their gradually increasing  
135 transcriptional outputs across the PZ axis (Figs 3C, 3D).

### 136 **Frequency of one ATS class, the cATS, corresponds to mRNA yield**

137 Why might transcriptional probability and output have distinct patterns for a given gene? We  
138 considered the possibility that the frequency of the two ATS classes, iATS and cATS (Figure 2), underlie  
139 the explanation. iATS are uniquely detected with the first intron probe, so nascent transcripts at iATS  
140 have elongated through much of the long intron, but not the downstream exons (Figure 3E, top). By  
141 contrast, cATS are detected with both exon and intron probes, so nascent transcripts at cATS must have  
142 elongated through both the long intron and the downstream exons (Figure 3E, bottom). Because iATS  
143 and cATS reveal transcription sites dominated by different extents of transcriptional progression, cATS  
144 would be expected to yield a more robust transcriptional output than iATS. Based on that idea, we  
145 determined the frequencies of each ATS class, measured as a percentage of all ATS, and asked if their  
146 frequencies change along the PZ developmental axis. One might have thought that iATS and cATS  
147 frequencies would simply reflect the extent of sequence covered by each probe set. If that were the  
148 case, they would be the same regardless of position. However, iATS and cATS frequencies had gene-  
149 specific patterns along the PZ axis (Figure 3F-H). For example, *mpk-1* cATS frequency increased steadily  
150 from ~30% distally to ~75% at row 12, and iATS frequency decreased correspondingly (Figure 3F). A  
151 similar trend was found for *lag-3* (Figure 3H), but the *lag-1* cATS frequency initially decreased and then  
152 leveled off across the PZ (Figure 3G). These patterns suggest that transcriptional progression is gene-  
153 specific and changes as germ cells move through the PZ. A logical extension of that idea is that the  
154 pattern of only one class, the cATS with their full or nearly full-length transcripts, is responsible for the  
155 pattern of mRNA production. That prediction was borne out by comparing patterns of ATS, cATS, iATS,  
156 and mRNAs in gene-specific graphs (Figure 3I-J) and finding positive correlations between cATS  
157 frequency and mRNA number and negative correlations between iATS frequency and mRNA number  
158 (Table 1). We conclude that cATS frequency, not iATS frequency, drives mRNA output as germ cells  
159 mature through the PZ (see Discussion).

#### 160 ***mpk-1*, *lag-1*, and *lag-3* transcription in the early Pachytene Region**

161 We next investigated transcription of the same three genes in a different region of the gonad, where  
162 germ cells have begun to differentiate. Specifically, we focused on 12 rows of germ cells that begin at  
163 the proximal boundary of the Transition Zone (TZ) and extend into the Pachytene Region (Figure 4A).  
164 Germ cells here have entered the pachytene stage of meiotic prophase and begun oogenesis. For  
165 simplicity, we refer to the region as EP for early pachytene. Though germ cells are not dividing  
166 mitotically, they move proximally through the EP at a rate of ~1 row per hour (Albert Hubbard and  
167 Schedl, 2019; Crittenden et al., 2006), and progressively mature as they move along the distal-proximal  
168 axis.

169 Analyses in the EP paralleled those in the distal PZ (see Figure S7 for representative smFISH images).  
170 The *mpk-1*, *lag-1*, and *lag-3* genes were actively transcribed across the region: the percentages of cells  
171 with any ATS ranged from ~50-80% (Figure 4B; Figure S8A-C), and ATS numbered zero to four per  
172 nucleus as expected (Figure S8D-F). The number of nascent transcripts at cATS was steady across the  
173 region for each gene (Figure 4C; Figure S8G-I), while mRNA numbers were essentially uniform or  
174 increased slightly (Figure 4D; Figure S8J-O). Strikingly and in contrast to the PZ, most ATS were cATS  
175 throughout the EP region (Figure 4E-G). Display of the various measures of transcription in a single  
176 graph highlights their similarity (Figure 4H-J). Again, high cATS frequencies match abundance of  
177 cytoplasmic mRNAs. Thus, the ATS class frequencies and hence transcriptional progression appear  
178 relatively uniform for these genes as they move through early pachytene.

#### 179 180 **Deletions in the *mpk-1* long first intron have either minor or no detectable germline defects**

181 We considered the idea that the size or content of the long first intron of each gene might influence  
182 the pattern of cATS frequency in the PZ. Introns can contain regulatory elements that affect numerous  
183 aspects of the transcription process, including elongation and splicing (Chorev and Carmel, 2012; Gubb,

184 1986; Parenteau et al., 2019; Rose, 2019; Swinburne et al., 2008; Swinburne and Silver, 2008; Takashima  
185 et al., 2011). To address this issue, we focused on *mpk-1* for two reasons. First, the *mpk-1b* isoform is  
186 the principal and likely only *mpk-1* transcript in the germline (Figure 1C) (Lee et al., 2007; Robinson-  
187 Thiewes et al., in preparation). As a result, *mpk-1* smFISH in the germline scores this isoform specifically.  
188 By contrast, tissue-specificity is unknown for the isoforms of the other genes (Figure 1D-E). Second, a  
189 5.7 kb deletion in the *mpk-1* intron (Figure 1C) is homozygous viable. Therefore, the regulatory effects of  
190 potential elements within the *mpk-1* long first intron can be investigated with mutants. By contrast, an  
191 analogous deletion in *lag-3* (Figure 1D) is embryonic lethal and the analogous *lag-1* intron deletion could  
192 not be recovered.

193 We made 1 kb deletions at the 5' end (5'  $\Delta$ ), middle (mid  $\Delta$ ) and 3' end (3'  $\Delta$ ) of the *mpk-1* long first  
194 intron at the endogenous locus (Figure 5A). To choose the specific regions removed, we used a  
195 combination of homology searches and ChIP datasets. The 5'  $\Delta$  mutant removed a 90 bp sequence  
196 predicted *in silico* to form a hair-pin loop and is repeated throughout the *C. elegans* genome (Table S2);  
197 we chose this region because a hair-pin loop in the first intron of *MYB* attenuates its transcription  
198 (Bender et al., 1987; Pereira et al., 2015). The mid  $\Delta$  mutant removed a region enriched for RNA  
199 polymerase (RNAP) II serine 5 phosphorylation and epigenetic markers of an enhancer (Liu et al., 2011);  
200 we chose this region because in other genes, intragenic enhancers have been found to attenuate  
201 transcription (Cinghu et al., 2017). The 3'  $\Delta$  mutant removed a region with no distinguishing features. To  
202 avoid splicing defects, the 5' end of 5'  $\Delta$  was placed 287 bp downstream of the 5' splice site, and the 3'  
203 end of 3'  $\Delta$  was placed 170 bp upstream of the predicted branch site and 197 bp upstream of the 3'  
204 splice site.

205 To test effects of the deletions on germline function, we assayed each 1 kb deletion mutant for  
206 fertility and PZ size. We also scored the fertility of animals homozygous for the large 5.7 kb deletion  
207 used to test intron probe specificity (large  $\Delta$ ). While loss of the *mpk-1b* germline isoform causes fully  
208 penetrant sterility (Robinson-Thiewes et al., in preparation), the 5'  $\Delta$  and 3'  $\Delta$  mutants were fertile and  
209 the mid  $\Delta$  and large  $\Delta$  mutants were mostly fertile, with a partially penetrant sterility at higher  
210 temperature (Figure 5B). Moreover, PZ length was similar to wildtype in 5'  $\Delta$  and 3'  $\Delta$  mutants and  
211 reduced by only  $\sim 5$  gcd in mid  $\Delta$  and large  $\Delta$  mutants (Figure 5C). We also noted that the mid  $\Delta$  and  
212 large  $\Delta$  mutants were vulvaless, a defect associated with MPK-1 loss in the soma (Lackner et al., 1994;  
213 Wu and Han, 1994). Therefore, mid  $\Delta$  likely removes a somatic enhancer. Unexpectedly, the large  $\Delta$   
214 mutants were  $\sim 30\%$  dauer constitutive, a *mpk-1* defect not reported previously to our knowledge. We  
215 conclude that a 1 kb reduction in the long first *mpk-1* intron has no dramatic effect on germline  
216 function.

217 We also assayed transcription of each 1 kb intron deletion mutant. These deletions remove a  
218 roughly equal number of individual probes from the intron probe set (Figure 5A, Table S1); the large  $\Delta$   
219 mutant, by contrast, removes most individual probes from the intron probe set and was therefore not  
220 analyzed (Figure S1C). For each 1 kb intron deletion mutant, we performed the same experiments and  
221 analyses done with wildtype, as described above. In the distal PZ, transcriptional probability (percent  
222 cells with any ATS) was essentially the same in wildtype and the three mutants in the distal PZ (Figure  
223 S9A-H). Transcriptional output, scored either as number of nascent transcripts (Figure S9I-L) or number  
224 of mRNAs (Figure S9M-T), was similar in the three mutants and wildtype. While the gradient in percent  
225 cATS appeared to shift distally by  $\sim 2$  gcd in the mid  $\Delta$  and 3'  $\Delta$  mutants (Figure 5D-G), that shift was not  
226 statistically significant (student's t-test), and cATS frequencies were similar to the wildtype control  
227 (Figure 5H-K). Transcription in the EP region was also equivalent in wildtype and deletion mutants. We  
228 conclude that a 1 kb size reduction of the first long *mpk-1* intron (5'  $\Delta$ , mid  $\Delta$ , and 3'  $\Delta$ ), removal of the  
229 hairpin loop (5'  $\Delta$ ), and removal of the putative somatic enhancer (mid  $\Delta$ ) have no significant effect on  
230 *mpk-1* transcription in the germ cells assayed.

231



232 ***mpk-1* developmental pattern of cATS frequency is sex-specific**

233 Finally, we asked if the dramatically graded increase in *mpk-1* cATS frequency that was found in the  
234 hermaphrodite PZ might reflect a developmental control related to GSC maturation. If this were the  
235 case, a similar increase would be expected in the male germline, where GSCs also reside distally and  
236 their daughters are triggered to differentiate as they leave the niche (Figure 6A) (Crittenden et al.,  
237 2019). To test this prediction, we analyzed *mpk-1* cATS frequency in adult male PZs and EPs (Figure 6A,  
238 red boxes). However, the male pattern of cATS frequency was different from that in hermaphrodites. In  
239 the distal-most GSCs within the male niche, the cATS frequency was ~50% and increased to ~65% by row  
240 12 of the male PZ (Figure 6B). In the male EP region, cATS frequency dropped from ~80% at the TZ/EP  
241 boundary to ~40% by row 12 (Figure 6C). The *mpk-1* cATS frequency pattern is therefore sexually  
242 dimorphic (Figure 6D, 6E). The male EP decrease in cATS frequency matches well with the previously  
243 reported decrease in MPK-1 protein abundance in the same region (Min Ho Lee et al., 2007). We  
244 suggest that the sexually dimorphic patterns in cATS frequency reflect sex-specific changes in  
245 transcriptional progression that are related to sperm fate specification in the male PZ and production of  
246 maternal RNAs in the hermaphrodite EP (see Discussion).

247

248 **Discussion**

249 This study analyzes transcription of three key regulatory genes during *C. elegans* germline development,  
250 using smFISH to visualize single active transcription sites (ATS) and mRNAs. Our results lead to three  
251 major conclusions. First, we identify distinct ATS classes: iATS harbor partial nascent transcripts while  
252 cATS harbor full length nascent transcripts. Second, we find that the frequencies of these ATS classes  
253 change in gene- and sex-specific fashion along the germline developmental axis, suggesting  
254 developmental regulation. Finally, we show that only one ATS class, the cATS, correlates with  
255 transcriptional productivity, suggesting an impact of ATS class on gene expression.

256

257 ***Two ATS classes with distinct extents of transcriptional progression and transcriptional output***

258 Classically, ATS are thought to harbor multiple transcripts that vary in degree of completeness  
259 (Darzacq et al., 2007; Femino et al., 1998; Mcknight and Miller, 1976). The discovery of iATS and cATS  
260 demonstrates that ATS can exist in different states with distinct extents of transcriptional progression  
261 through a gene. The iATS are detected only with the 5' probe set and this ATS class must be dominated  
262 by partial transcripts; by contrast, cATS are detected with both 5' and 3' probe sets and must include  
263 complete or nearly complete transcripts, likely in addition to partial transcripts (Figure 7A). This  
264 interpretation is consistent with previous studies that used smFISH to investigate transcriptional  
265 progression (Bartman et al., 2019; Coté et al., 2020; Darzacq et al., 2007; Pichon et al., 2018). Moreover,  
266 alternative explanations seem unlikely. The lack of an overlapping exon signal at iATS might be explained  
267 if the spliced long intron was tethered to the site while full-length transcripts were released rapidly.  
268 However, introns are typically degraded quickly (Clement et al., 1999) or moved to nuclear speckles for  
269 degradation (Daguenet et al., 2012; Dias et al., 2010; Galganski et al., 2017), and a rapid release of full-  
270 length transcripts is inconsistent with the negative correlation between iATS frequency and  
271 transcriptional output (Table 1C). We therefore favor the idea that iATS and cATS sites differ in their  
272 extents of transcriptional progression (Figure 7A).

273 We do not understand the mechanism responsible for formation of these two ATS classes. The  
274 simplest explanation is that transcriptional elongation is slowed or paused at iATS, perhaps in the long  
275 first intron. That slowing or pausing cannot be the same as “promoter-proximal pausing”, which occurs  
276 ~20-60 bp downstream of transcriptional initiation and would not generate a transcript detectable with  
277 the first intron probe (Adelman and Lis, 2012; Jonkers and Lis, 2015; Sheridan et al., 2018). If pausing  
278 does occur at iATS, it could be coupled to splicing (Alexander et al., 2010; Mayer et al., 2015; Nojima et  
279 al., 2015; Saldi et al., 2016). However, splicing pauses detected to date in other systems are short, on

280 the order of seconds to minutes (Alpert et al., 2017; Martin et al., 2013; Singh and Padgett, 2009).  
281 Another plausible explanation is that transcription is aborted at iATS. Abortive transcription occurs in  
282 *Drosophila* embryos, where mitosis truncates transcription of very long genes in cells with very short cell  
283 cycles (Gubb, 1986; Kwasnieski et al., 2019; Shermoen and O'Farrell, 1991; Swinburne and Silver, 2008;  
284 Tadros and Lipshitz, 2009). However, in the iATS reported in our work, elongation through each of the  
285 genes investigated is predicted to take <15 minutes, based on rates of 1-4kb/sec (Darzacq et al., 2007;  
286 Martin et al., 2013; Singh and Padgett, 2009), far less than the ~6hr cell cycle in the progenitor zone  
287 (Albert Hubbard and Schedl, 2019); thus, iATS are unlikely to be the result of aborted transcription at  
288 mitosis. Differentiating among these various mechanisms is challenging in the *C. elegans* germline, and  
289 iATS *per se* have not yet been reported in cultured cells. Nonetheless, although speculative, we suggest  
290 that iATS result from transcriptional pausing, perhaps during RNAP II elongation or splicing of the long  
291 first intron.

292

### 293 ***Graded cATS frequency is coupled to a graded transcriptional output***

294 One of our most striking findings is that frequencies of the two ATS classes, iATS and cATS, are  
295 patterned in development. Whereas the probability of a nucleus harboring any ATS was essentially the  
296 same for all germ cells in the two regions investigated, the frequencies of the two ATS classes changed  
297 dramatically and reciprocally as germ cells mature. Indeed, the *mpk-1* and *lag-3* frequencies were  
298 clearly graded in the hermaphrodite progenitor zone. For both of these genes, iATS frequency started  
299 high in GSCs within the niche and dropped as their daughters left the niche and moved through the  
300 progenitor zone; conversely, cATS frequency started low and increased across the same region. These  
301 reciprocally graded iATS and cATS frequencies likely reflect graded and regulated changes in the ability  
302 of an ATS to complete transcription through the gene.

303 An important corollary of the iATS class with its partial transcripts is that existence of an active  
304 transcription site does not ensure production of mRNAs. The iATS frequency had a pattern opposite to  
305 that of transcriptional yield, measured both as production of full-length nascent transcripts and mature  
306 mRNAs, whereas the cATS frequency pattern aligned well with these two measures of transcriptional  
307 output. Future smFISH studies must therefore consider not only formation of ATS, but the ATS class and  
308 its productivity. This caution may be most important for genes with long introns or perhaps simply long  
309 genes. We suspected that some aspect of the long first intron might be critical for producing the two  
310 ATS classes but were not able to identify it with designer deletions. Regardless, for the genes  
311 investigated in this work, we suggest that the regulated balance between cATS and iATS classes is an  
312 important factor in driving gene expression.

313

### 314 ***ATS classes are gene-, stage- and sex-specific during germline development***

315 The three genes investigated in this work—*mpk-1*, *lag-1*, and *lag-3*—encode key regulators of  
316 development (see Introduction). In the germline tissue, they regulate stem cell maintenance, sex  
317 determination, and several steps of differentiation (Figure 1B); elsewhere, they regulate embryogenesis  
318 and post-embryonic somatic development (Priess, 2005; Sternberg, 2005). Here we consider how the  
319 patterns of ATS class frequency relate to germline function. In hermaphrodites, pachytene cells act as  
320 nurse cells for oocytes (Wolke et al., 2007) and all three genes produce maternal mRNAs (Stoeckius et  
321 al., 2014), consistent with their high cATS frequency and abundant transcriptional yield to load maternal  
322 mRNAs into the oocyte. Little is known about *lag-1* and *lag-3* function in germline differentiation; by  
323 contrast, *mpk-1* is critical (see below).

324 The functions of patterned cATS frequencies in the progenitor zone are more nuanced. The *lag-1*  
325 and *lag-3* genes encode essential components of the Notch-dependent transcription factor complex to  
326 maintain GSCs in response to niche signaling (Kershner et al., 2014; Lambie and Kimble, 1991; Lee et al.,  
327 2016; Petcherski and Kimble, 2000). Consistent with that role, the *lag-1* cATS frequency and

328 transcriptional output are higher in GSCs than in the more proximal PZ (this work), and LAG-1 protein is  
329 expressed similarly (Chen et al., 2020). The *lag-3* cATS pattern was low in GSCs even though the LAG-3  
330 protein is clearly functioning there to maintain GSCs. The distribution of LAG-3 protein is not yet known.  
331 One clue that it may be necessary to keep the LAG-3 protein a low level in GSCs is that LAG-3 forms a  
332 complex in the nucleus with the Notch intracellular domain (NICD) (Petcherski and Kimble, 2000), and  
333 abundance of nuclear NICD is vanishingly low (Crittenden et al., 1994; Sorensen et al., 2020). We  
334 suspect that LAG-3 abundance is kept low to work with its low-abundance NICD companion for Notch-  
335 dependent transcriptional activation. Moreover, mammalian Mastermind-like (MAML), a LAG-3  
336 ortholog (Kitagawa, 2015; McElhinny et al., 2008; Wu and Griffin, 2004; Zhao et al., 2007), is often  
337 overexpressed in cancers (Forghanifard et al., 2012; Wu and Griffin, 2004). Perhaps, a low *lag-3* cATS  
338 frequency maintains a low but functional level of LAG-3 and prevents overexpression that could induce  
339 tumorigenesis.

340 The *mpk-1* gene encodes ERK/MAPK, which functions at several steps of germline differentiation:  
341 sperm fate specification, meiotic progression, and oocyte maturation (Arur et al., 2011; Church et al.,  
342 1995; Min Ho Lee et al., 2007; Lopez 3rd et al., 2013; Morgan et al., 2013). These functions all rely on a  
343 single germline-specific isoform, *mpk-1b* mRNA, which in hermaphrodites, generates low MPK-1B  
344 protein in the PZ and increasing MPK-1B as germ cells progress through differentiation (Min Ho Lee et  
345 al., 2007; Myon Hee Lee et al., 2007; Robinson-Thiewes et al., in preparation). As shown in Figure 7B,  
346 the pattern of *mpk-1* cATS frequency and transcriptional output in hermaphrodites conforms to the  
347 pattern of MPK-1B protein expression and its established functions in meiotic progression and oocyte  
348 maturation. Given its prominent role in germline differentiation, *mpk-1* expression might have been  
349 kept low in GSCs to maintain stem cells. However, germline sexual identity is established in the PZ  
350 (Morgan et al., 2013, 2010) and *mpk-1* also promotes sperm fate specification (Min Ho Lee et al., 2007).  
351 Indeed, the *mpk-1* cATS frequency was sexually dimorphic: 25% in GSCs of oogenic but ~60% in GSCs of  
352 spermatogenic germline (Figure 7B). Therefore, a low cATS frequency is not required for stem cell  
353 maintenance and is consistent with a role in preventing sperm fate specification in adult  
354 hermaphrodites. More proximally, the *mpk-1* cATS frequency increases and stays high in the early  
355 pachytene region of oogenic hermaphrodites, presumably to generate its maternal load, but decreases  
356 dramatically in the early pachytene region of spermatogenic adult males. Although the abundance and  
357 activity of MPK-1/ERK are also regulated post-transcriptionally and post-translationally (Myon Hee Lee  
358 et al., 2007; Yoon et al., 2017), regulation of ATS class, and hence regulation of transcriptional  
359 progression, emerges as its earliest point of developmental control.

360

### 361 **Future directions**

362 A deeper understanding of ATS classes and their regulation is a challenge for future studies. One  
363 key question that can now be addressed is whether iATS exist at other genes and outside the *C. elegans*  
364 germline –in other tissues and other species. Although this seems likely, it remains speculation for now.  
365 The literature reveals plausible iATS candidates in *Drosophila* and mouse (Shermoen and O’Farrell,  
366 1991; Takashima et al., 2011), but the use of different methods in those studies make iATS equivalence  
367 uncertain. Thus, identifying iATS in other genes, tissues, and organisms will demonstrate their general  
368 significance and finding them in cultured cells will open their analysis to powerful biochemical and  
369 genomic methods. The *C. elegans* germline is poised to conduct more refined smFISH analyses as well  
370 as live imaging to probe the nature of iATS – does a pause occur, and if so, where in the gene and for  
371 how long? However, iATS in the *C. elegans* germline exist in limited regions, and can be of low  
372 frequency, both disadvantages for -omics methods. Regardless, the identification of a graded  
373 developmental transition from the iATS class with its partial transcripts to cATS with its complete  
374 transcripts opens the possibility of a new mode of transcriptional regulation.

375



376 **Acknowledgements:** We thank members of the Kimble lab, Wickens lab, David Brow, Bob Landick,  
377 Daniel Panaccione, and Aaron Hoskins for engaging and thoughtful discussions during the course of this  
378 work. We thank Brian Carrick, Sarah Crittenden, and Tina Lynch for critical readings of the manuscript.  
379 We also thank ChangHwan Lee for generously sharing his expertise with smFISH, MATLAB, and *lag-3*  
380 RNAi. SR was supported by the National Science Foundation Graduate Research Fellowship under grant  
381 No. (DGE-1256259) and the NIH Predoctoral training grant in Genetics 5T32GM007133. JK was an HHMI  
382 Investigator and is now supported by NIH R01 GM134119. Any opinion, findings, and conclusions or  
383 recommendations expressed in this material are those of the authors(s) and do not necessarily reflect  
384 the views of the National Science Foundation.

385

## 386 **Methods**

387

388 **Strains and Maintenance:** All strains were maintained at 20°C (Brenner, 1974) unless otherwise  
389 indicated. See Table S3 for strain names and full genotypes. Most experiments were done using wild-  
390 type N2 animals.

391

392 **Allele generation:** All mutations were made using the co-CRISPR method as described (Dokshin et al.,  
393 2018; Paix et al., 2014) with guides listed in Table S4. All mutations were isolated at 25°C, but then  
394 outcrossed 2X times to wildtype and either homozygosed or balanced with qCl [qIs26] III at 20°C.

395

396 **smFISH probe design and specificity controls:** All smFISH probe sets were designed using Stellaris probe  
397 designer (<https://www.biosearchtech.com/stellaris-designer>), using the sequence of the first intron for  
398 the intron probe set or the sequences of all exons for the exon probe set. For each probe set, a mask of  
399 5 was used to maximize specificity. Each probe was compared to the *C. elegans* genome using BLAT  
400 (<https://genome.ucsc.edu/cgi-bin/hgBlat>) for independent confirmation of sequence specificity. See  
401 Table S1 for individual probe sequences and fluorophores conjugated to each probe set. RNA specificity  
402 was confirmed using  $\alpha$ -amanitin to inhibit RNA production following a published procedure (Lee et al.,  
403 2016). Briefly, N2 mid-L4 worms were placed on a fresh plate 12 hr before the experiment. Adults were  
404 washed off the plate with M9 and incubated in 500  $\mu$ L M9 with 100  $\mu$ g/mL  $\alpha$ -amanitin, rotating in the  
405 dark for 4 hrs. After incubation, gonads were extruded and stained using the smFISH protocol described  
406 below. *mpk-1* smFISH intron probe specificity was confirmed using the *mpk-1* (*q1084*) large  $\Delta$  and exon  
407 probe specificity was confirmed using the *mpk-1* (*q1069*) mutation, which carries a frameshift in the  
408 *mpk-1b* specific first exon. *lag-1* and *lag-3* probe specificities were confirmed using RNAi with the  
409 protocol from (Ahringer, 2006), because mutants are either embryonic lethal, L1 lethal, or lack germline  
410 tissue (Christensen et al., 1996; Petcherski and Kimble, 2000). RNAi was performed HT115 bacteria  
411 carrying either *lag-1*, *lag-3*, or empty vector were grown overnight and 100  $\mu$ L seeded to each plate.  
412 Bleach synchronized N2 worms were placed on empty and RNAi plates (L1s for *lag-1* and L4s for *lag-3*);  
413 for both genes, worms were grown to adulthood and their embryos processed for smFISH (see below).

414 **smFISH:** All steps were performed under RNase free conditions: the workspace, gloves, and pipettes  
415 were routinely cleaned using RNase Zap (ThermoFisher, AM9780), RNase free tips were used, nuclease  
416 free water (ThermoFisher, AM9932) and RNase free TE (ThermoFisher, AM9849) were used to make  
417 buffers. The “original” *mpk-1* smFISH probes were used in Figure 2E and “swapped” *mpk-1* probes were  
418 used for all other experiments (Table S5).

419 **Gonad smFISH:** All gonads were stained at the mid L4 + 12 hr timepoint, as described (Lee et al., 2017,  
420 2016). Briefly, mid-L4 worms were picked to plates 12 hrs before gonad dissection. Hermaphrodites or  
421 males were washed from plates with a M9+tween mixture and anaesthetized in 0.25 mM levamisole;

422 after dissection, gonads were washed in 500  $\mu$ L 1XPBS + tween (PBSTw) solution and fixed in 1 mL 3.7 %  
423 formaldehyde in PBSTw for 20 minutes, rotating at room temperature. Gonads were then washed with  
424 1 mL PBSTw and permeabilized with 1 mL PBSTw + 0.1 % Triton-X for 10 minutes, rotating at room  
425 temperature. Gonads were then washed 2X with 1 mL PBSTw and left in 1 mL 70% ethanol (diluted in  
426 nuclease-free water) overnight at 4 °C. The next day, ethanol was replaced with a 1 mL smFISH wash  
427 (10% formamide, 2X SSC, and Tween-20) for 5 minutes. smFISH probes were diluted in hybridization  
428 buffer (10% formamide, 2X SSC, 100 mg dextran sulfate per mL of buffer) with probe concentration  
429 depending on the probe set (Table S5). Gonads were rotated at 37 °C overnight in the dark, washed in 1  
430 mL smFISH wash + 1: 1000 DAPI (1 mg/mL) for 30 minutes, rotating in the dark at 37 °C and finally  
431 quickly washed 2X with 1 mL smFISH wash. Gonads were mounted in 18  $\mu$ m Prolong Glass  
432 (ThermoFisher, P36984), cured in the dark for 2 days at room temperature, and sealed with VALAP.  
433 Slides were stored at -20 °C until imaged.

434 *Embryo smFISH:* Staining was modified from a previous protocol (Ji and van Oudenaarden, 2012) using  
435 smFISH solutions described above. Embryos were washed from plates with M9. After spinning and  
436 supernatant removal, bleaching solution (745 mL concentrated Clorox Bleach, 0.5  $\mu$ L 4N NaOH, and  
437 3.750 mL M9) was added, and samples rocked gently for 4 minutes at room temperature. After bleach  
438 removal, embryos were washed 3X with M9 and transferred to an RNase free microcentrifuge tube with  
439 1000  $\mu$ L of fix solution. Tubes were immediately put in liquid nitrogen to freeze crack the eggshell and  
440 then transferred to an ice bath and allowed to thaw for 20 minutes. After removal of the fix, embryos  
441 were washed 1X 1 mL PBSTw, 70% ethanol was added, and samples were left overnight at 4 °C. The  
442 next day, ethanol was replaced with 1 mL smFISH wash added for 5 minutes, which was replaced with  
443 hybridization buffer and a probe set. Hybridizing embryos were rocked gently overnight at 37 °C in the  
444 dark. The next day, embryos were washed with 1 mL smFISH + 1:1000 DAPI (1 mg/mL) and rocked again  
445 at 37 °C for 30 minutes in the dark. After DAPI, embryos were washed 2X with 1 mL smFISH wash,  
446 mounted in 18  $\mu$ L of Prolong Glass and cured for 2 days in the dark at room temperature. Slides were  
447 sealed with VALAP and kept at -20 °C until imaged.

448  
449 **Biological replicates:** Two biological replicates were done for all experiments performed with wildtype  
450 hermaphrodites and males. To ensure the two replicates were exposed to essentially the same  
451 conditions, animals for each replicate were raised on separate OP50 plates in the same incubator; their  
452 gonads were dissected separately but in parallel; and smFISH was done separately but in parallel. For  
453 imaging, one replicate was imaged one day and the other second was imaged the next day. Each  
454 replicate was analyzed independently using the MATLAB code. For each type of experiment, the two  
455 replicates were compared for all assessed measures using the student's t-test. For all experiments,  
456 replicates did not differ significantly and datasets were combined for presentation. For *mpk-1* replicate  
457 1, all 20 PZ images were used in downstream analyses; 19 of 21 EP images were used for analyses. For  
458 *mpk-1* replicate 2, 17 of 20 PZ images were used; 17 of 20 EP images were used. For *lag-3* replicate 1,  
459 13 of 20 PZ images were used for analyses; 18 of 20 EP images were used for analyses. For *lag-3*  
460 replicate 2, 19 of 20 PZ images were used; 19 of 20 EP images were used. For male *mpk-1* replicate 1, all  
461 13 PZ images were used for analyses; 11 of 13 EP images were used for analyses. For male *mpk-1*  
462 replicate 2, 11 of 12 PZ images were used for analyses; 11 of 12 EP images were used. See MATLAB  
463 Image Processing for reasons selected images were removed. For smFISH of the mutants, wildtype was  
464 done in parallel with the mutants, but only one replicate was done—see Figure S9 legend for details.

465  
466 **Image Acquisition:** All smFISH stained gonads and eggs were imaged as described (Lee et al., 2016). All  
467 smFISH images were captured using a Leica SP8 confocal microscope. For TAMRA dye (651 nm), Quasar  
468 670 (633 nm), Quasar 570 (561 nm), and far red 610 (594 nm), 2% laser power was used for excitation,

469 while DAPI was excited using 1.5% laser power (UV 405 nm). Fluorescence signals were collected as  
470 follows: DAPI, 412-508 nm; TAMRA, 564-627 nm; Quasar 670, 650-700 nm; Quasar 570, 564-588 nm;  
471 and far red 610, 600-680 nm.

472

#### 473 **MATLAB Image Processing:**

474 *Threshold determination:* The program RunBatch was used to determine the optimal threshold value for  
475 the relevant probe set for all images. Data from each image channel was then visualized using the  
476 program “detectionCheck\_mpk1” (available on GitHub with publication). The threshold value was  
477 chosen that best captured intron and exon signals when compared to the raw image by manual  
478 inspection. Once the optimal threshold value was determined, images were further processed in  
479 MATLAB. An individual image was excluded from further analysis if the nuclear signal could not be  
480 detected and/or no threshold value could accurately represent the visible signals.

481 *MATLAB image processing:* MATLAB workflow is summarized in Figure S4 and based on a previous  
482 MATLAB code (Lee et al., 2016). Each channel—intron, exon, and DAPI—were independently detected.  
483 Background from the intron channel was used to generate the 3D tissue model and mark gonad  
484 boundaries in the image. Any exceptionally bright and/or irregular shaped signal outside the boundaries  
485 was discarded as a contaminant. Candidate signals were independently examined and defined from the  
486 intron and exon channels. For the intron channel, candidate signals were required to be nuclear, round,  
487 and of an intensity value greater than the background. The percent of discarded intron probe- detected  
488 signals per gonad varied: 0.5% for *mpk-1*, 0.02% for *lag-1*, and 4.3% for *lag-3*. For the exon channel,  
489 candidate nuclear signals had to be nuclear, round, and of an intensity greater than the mean intensity  
490 of a single mRNA. In addition, each signal was designated as nuclear (within DAPI boundary), in a  
491 Voronoi defined cell of 3  $\mu\text{m}$  from the center of the nucleus, or in the shared cytoplasmic core or  
492 “rachis” of the germline. Exon only detected nuclear signals were discarded (see Figure S4); their  
493 detections varied per gonad depending on gene—3.2% for *mpk-1*, 3.5% for *lag-1*, and 2.8% for *lag-3*. If  
494 DAPI did not form a sphere, which happened in cells on the boundary of the image window, any nuclear  
495 ATS and cytoplasmic mRNAs were discarded.

496 *MATLAB post-image analysis:* Metadata from image processing were imported into MATLAB to score  
497 raw data. The intensities from intron and exon probe sets were analyzed as described (Lee et al., 2016)  
498 to confirm single molecule detection for each gene. For all three genes, over 96% of the cytoplasmic  
499 exon signals clustered around one value that was deemed to correspond to a single mRNA. For each  
500 gene, replicate 1 and replicate 2 were compared for all analyses with the student’s t-test. All data from  
501 the replicates for a single gene and condition were not statistically different and combined. Data  
502 acquired as a function of germline position were grouped into “bins” that corresponded to 5  $\mu\text{m}$   
503 windows spanning the length of the region of interest. Because cells have a 4.4  $\mu\text{m}$  diameter on  
504 average, each bin approximates a row of germ cells. To calculate transcriptional probability, DAPI  
505 defined nuclei were grouped into bins by position along the germline axis. For each bin, the number of  
506 ATS positive, either iATS or cATS, cells were counted and compared to the total number of nuclei in the  
507 same bin. For number of nascent transcripts in cATS, data were again grouped in bins. For each image,  
508 the cATS signal was calculated from a comparison to the average intensity of a single cytoplasmic mRNA  
509 in the same image. cATS intensities in each bin were added together and divided by the average mRNA  
510 intensity to determine the number of nascent transcripts per cell row. To quantify mRNA abundance in  
511 cells per row, we combined cytoplasmic exon probe signals from within a cell but excluded the rachis.  
512 Binning those numbers by position generated the number of mRNAs within cells per row. To estimate  
513 the number of mRNA per cell, we divided the number of mRNA per cell row by the number of nuclei in  
514 the cell row. We calculated frequencies of iATS and cATS as their percentage of total ATS per germ cell  
515 row, rather than per cell to avoid the cases of multiple loci firing in a single cell. All ATS were divided  
516 into bins as described above and the number of iATS and cATS were counted for each bin. The counts

517 were then converted into a percentage for each bin. Correlation tests relied on pair-wise comparisons  
518 of five “compiled” datasets (percent cells with ATS, cATS frequency, iATS frequency, number of nascent  
519 transcripts at cATS, and number of cellular mRNAs) that combined position-binned data. For example,  
520 the iATS frequency compiled dataset was made by combining the position-binned data from the iATS  
521 frequency analysis. After each compiled dataset was generated, Pearson’s correlation coefficients were  
522 calculated for pairs of datasets (see Table 1 for specific comparisons).

523

524 **Fertility assays:** Worms were grown at 15°C, 20°C, or 25°C for at least one generation before scoring  
525 fertility at each temperature. Worms were bleach-synchronized and grown to adulthood (L4 + 36 hr, L4  
526 + 24 hr, or L4 + 12 hr, respectively for each temperature). Adults were washed off plates with M9,  
527 anesthetized in 0.25 mM levamisole, mounted onto 2% agarose pads, and scored for presence of  
528 embryos using DIC on a Zeiss Axioskop microscope.

529

530 **Progenitor zone length assay:** All progenitor zone lengths were scored in gonads dissected from animals  
531 raised at 20°C, as described (Crittenden et al., 2006). Briefly, gonads were dissected from L4 + 12 hr  
532 adults in 0.25 mM levamisole in PBSTw and fixed in 300  $\mu$ L 2% paraformaldehyde in PBSTw for 10  
533 minutes, rotating at room temperature. Gonads were then washed in 1 mL PBSTw 1X, permeabilized in  
534 1 mL PBSTw + 0.5% BSA + 0.1% Triton-X for 10 minutes, rotating at room temperature, incubated with  
535 1:1000 DAPI (1 mg/mL) for 30 minutes, rotating in the dark at room temperature, and washed 3X in 1  
536 mL PBSTw. After removing excess liquid, gonads were mounted in 10  $\mu$ L Vectashield and kept at 4°C  
537 until imaged using the 63/1.4 NA Plan Achromat oil immersion objective of a Zeiss Axioskop  
538 microscope. DAPI was visualized using the Carl Zeiss filter set 49. Images were taken as previous  
539 described (Haupt et al., 2019).

540

541 **Statistical analyses:** All statistical tests were performed in MATLAB: student’s t-test (ttest2 function) and  
542 Pearson’s correlation tests (corr function). Significance cutoff of  $p \leq 0.01$  was used.

543

544 **Tables:**

545 **Table 1: Pearson's correlation tests between measures of transcription**

546

547 **A. Transcriptional probability (% cells with any ATS) vs**  
548 **transcriptional output (# mRNA in cells)**

| Gene         | Correlation coefficient (r) | p value |
|--------------|-----------------------------|---------|
| <i>mpk-1</i> | 0.0157                      | 0.7456  |
| <i>lag-1</i> | 0.0725                      | 0.1362  |
| <i>lag-3</i> | -0.0594                     | 0.0594  |

549

550 **B. cATS frequency (% ATS that are cATS) vs**  
551 **transcriptional output (# mRNA in cells)**

| Gene         | Correlation coefficient (r) | p value                  |
|--------------|-----------------------------|--------------------------|
| <i>mpk-1</i> | 0.4872                      | $7.5725 \times 10^{-28}$ |
| <i>lag-1</i> | 0.1272                      | 0.0081                   |
| <i>lag-3</i> | 0.4448                      | $4.6640 \times 10^{-20}$ |

552

553 **C. iATS frequency (% ATS that are iATS) vs**  
554 **transcriptional output (# mRNA in cells)**

| Gene         | Correlation coefficient (r) | p value                  |
|--------------|-----------------------------|--------------------------|
| <i>mpk-1</i> | -0.4520                     | $9.6179 \times 10^{-24}$ |
| <i>lag-1</i> | -0.1149                     | 0.0169                   |
| <i>lag-3</i> | -0.3836                     | $6.5252 \times 10^{-15}$ |

555

556 **D) Transcriptional output (# nascent transcripts)**  
557 **vs transcriptional output (# mRNA in cells)**

| Gene         | Correlation coefficient (r) | p value                   |
|--------------|-----------------------------|---------------------------|
| <i>mpk-1</i> | 0.8214                      | $1.9340 \times 10^{-106}$ |
| <i>lag-1</i> | 0.3807                      | $2.3929 \times 10^{-16}$  |
| <i>lag-3</i> | 0.8074                      | $3.9855 \times 10^{-86}$  |

558

559

560



561 **Figures and legends:**  
562

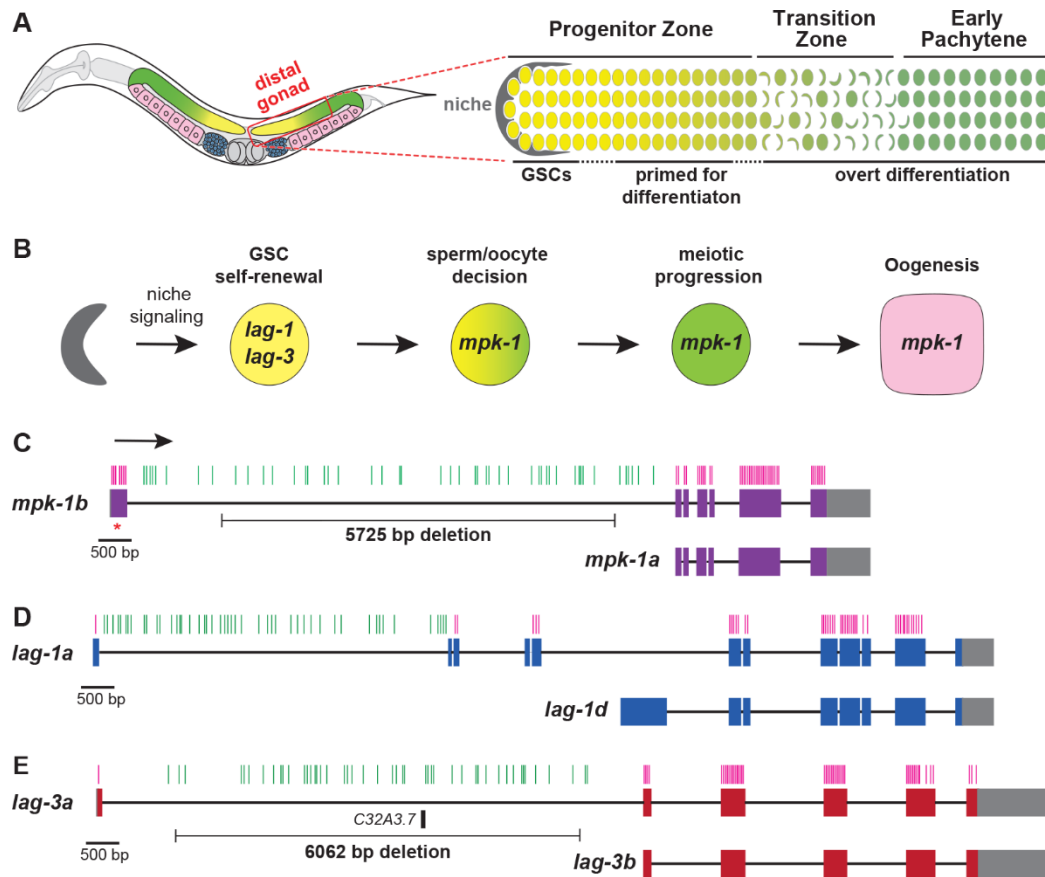

563  
564  
565 **Figure 1: *C. elegans* germline anatomy and key regulatory genes.** **A.** Left, adult hermaphrodite with two U-shaped  
566 gonadal arms (in color) that consist largely of germ cells maturing along a distal-proximal axis. In the distal gonad  
567 (red square), germline progenitors divide mitotically (yellow) and then enter meiotic prophase (green); in the  
568 proximal gonad, germ cells differentiate into sperm (blue) or oocytes (pink). Right, distal gonad. A single-celled  
569 somatic niche (grey) maintains germ cells in a naïve stem cell state (GSCs). The Progenitor Zone (PZ) includes GSCs  
570 within the niche and their daughters primed to differentiate; more proximally, germ cells enter meiotic prophase  
571 (green crescents). Transitions between germ cell states are marked as dashed lines. **B.** Regulators relevant to this  
572 work. Color scheme as in A. The *lag-1* and *lag-3* genes encode niche signaling components, the LAG-1 CSL DNA  
573 binding protein and LAG-3 Mastermind-like transcription factor (Christensen et al., 1996; Petcherski and Kimble,  
574 2000); *mpk-1* encodes MPK-1 ERK/MAP kinase, which promotes sperm fate specification, meiotic progression, and  
575 oogenesis (Arur et al., 2011; Church et al., 1995; Min Ho Lee et al., 2007; Lopez 3rd et al., 2013; Morgan et al.,  
576 2013). **C-E.** Architecture of genes encoding key regulators. Boxes, exons; lines, introns. Gene-specific colors in  
577 exons denote coding regions and grey indicates untranslated regions (UTR). The direction of transcription is the  
578 same for all genes (arrow in C). Short vertical lines above genes indicate sites of individual probes in the probe sets  
579 used for smFISH; these probe sets target either the large first intron (green) or all exons (magenta). Red asterisk  
580 marks site of a 1 bp frame-shifting insertion in the *mpk-1b* first exon, a mutant used as a control for *mpk-1* exon  
581 probe specificity. Deletions in *mpk-1* and *lag-3* long first introns were used to test for intron probe specificity. The  
582 *lag-1* gene makes four isoforms (*lag-1a-d*); *lag-1a-c* differ in size of exons 2 and 3 and for simplicity, *lag-1a* is  
583 shown to represent *lag-1a-c*. The *lag-3a* first intron contains a predicted ncRNA *C32A3.7*.

584

585

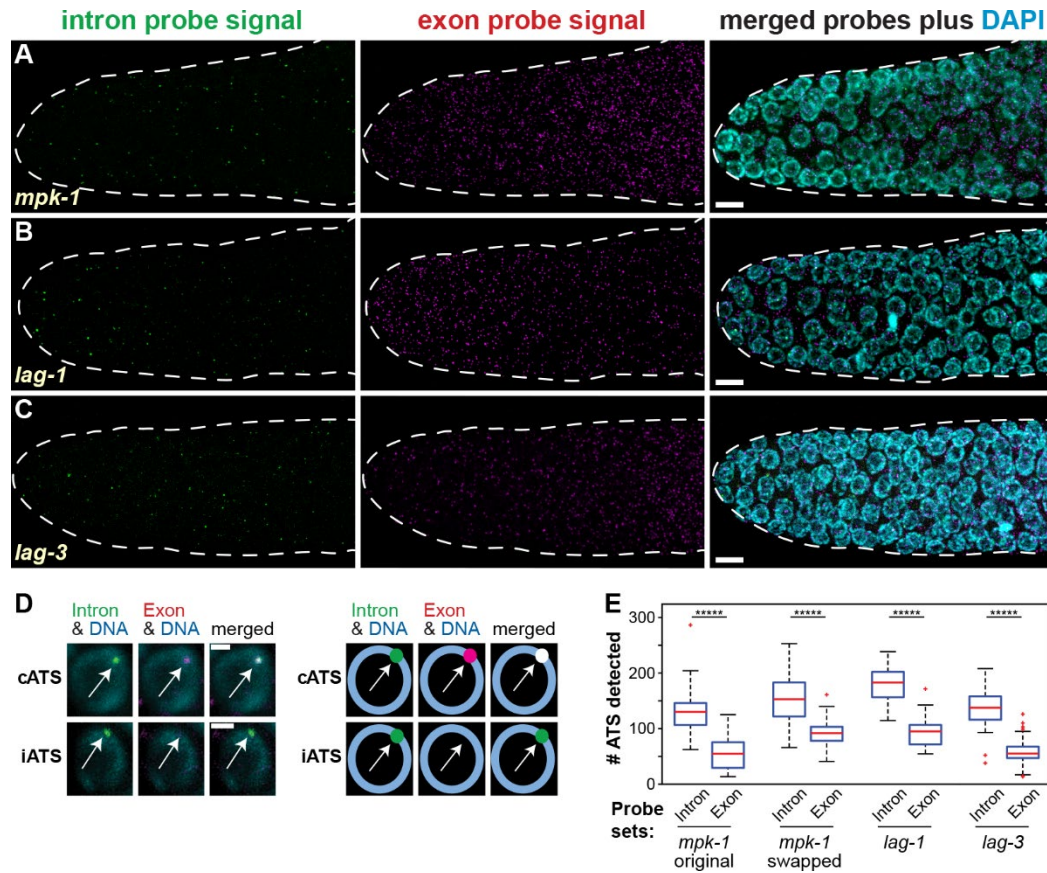

586

587 **Figure 2: Identification of two types of active transcription sites.** A-C. Maximum projections of smFISH images.  
 588 Left, intron probe set signals (green); middle, exon probe set signals (magenta); merge of both signals with DAPI  
 589 (cyan). Scale bar = 5  $\mu$ m. **D**. Two classes of active transcription sites (ATS). Left, images; right, cartoons. A cATS  
 590 (complete ATS) is seen by overlapping intron and exon signals; an iATS (incomplete ATS) is seen by a unique intron  
 591 signal. **E**. ATS numbers, regardless of type, detected with either the intron probe set (intron) or the exon probe set  
 592 (exon) for each gene. Overlaps of the intron-detected and exon-detected spots were not determined in this  
 593 analysis. To test if high intron detection reflected fluorophore bias, the fluorophores conjugated to the original  
 594 *mpk-1* intron and exon probes were swapped. \*\*\*\*p<0.000001, Student's t-test.  
 595

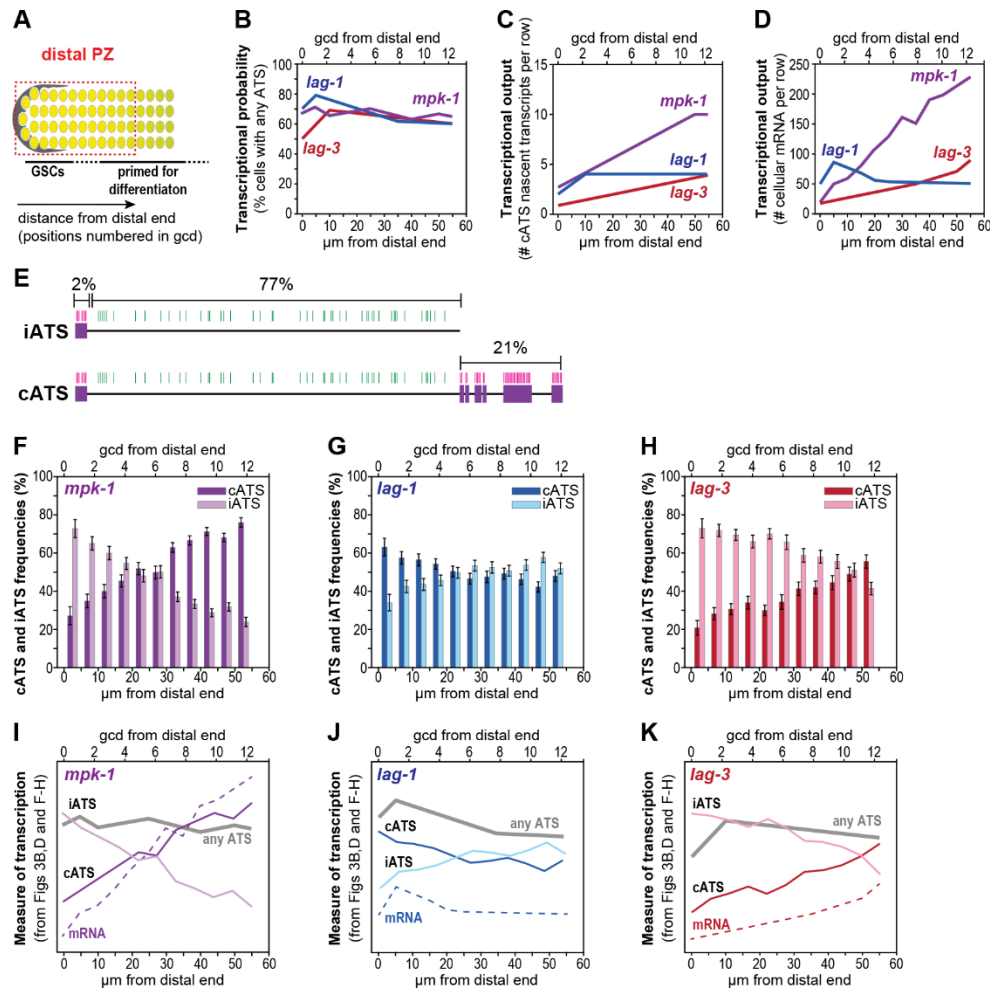

596 **Figure 3: Transcription of *mpk-1*, *lag-1* and *lag-3* in the distal progenitor zone.** **A.** Gonadal region scored (dashed  
597 red box) extends 12 germ cell diameters (gcd) into the progenitor zone (PZ) from the niche (grey). Numbers  
598 indicate position as gcd along the distal-proximal axis from the distal end, according to convention; MATLAB scores  
599 position in μm from the distal end, with each gcd averaging ~4.4 μm in this region (Lee et al., 2016). **B-D and F-K.** x-  
600 axis represents position in gcd (top) and μm (bottom). Number of gonads scored for each gene: *mpk-1*, n = 37;  
601 *lag-1*, n = 36; and *lag-3*, n = 32. **B.** Transcriptional probability measured as percentage of cells with at least one ATS,  
602 including iATS and cATS. Line plots derived from data in Figure S6(A-C). Total number of cells scored: *mpk-1*, n =  
603 6065; *lag-1*, n = 5981; and *lag-3*, n = 4472. **C.** Transcriptional output measured as total number of nascent  
604 transcripts at cATS, per cell row. We limited analysis to nascent transcripts at cATS, as explained in text and  
605 detailed in Methods. Line plots derived from data in Figure S6(G-I). **D.** Transcriptional output measured as total  
606 number of cellular mRNAs per cell row; mRNAs in rachis were excluded. Germ cell boundaries were determined  
607 from MATLAB-generated Voronoi cells as described in Methods. Line plots derived from data in Figure S6(J-L).  
608 Data for number of mRNA per cell in Figure S6(M-O). **E.** Detection of RNAs at iATS (above) and cATS (below). iATS  
609 are seen uniquely with the intron probe set whereas cATS are seen with overlapping exon and intron probe sets.  
610 The intron probe set spans 77% of the full-length transcript (excluding 3'UTR); by contrast, the exon probe set  
611 spans only 23%. **F-H.** iATS and cATS frequencies as a function of position. Each bar shows percentage of total ATS  
612 that are cATS (darker bars) or iATS (lighter bars). Numbers of total ATS (cATS plus iATS) scored: *mpk-1*, n = 5699;  
613 *lag-1*, n = 6610; and *lag-3*, n = 4200. Standard errors are shown. **I-K.** Measures of transcription taken from panels  
614 above and combined to highlight patterns of graded increase, decrease, or relative uniformity; individual lines  
615 represent quite different measures and specific values are therefore not comparable. Transcriptional probability  
616 (gray line) from panel 3B; cellular mRNA abundance per row (dashed line) from panel 3D; cATS frequency (dark  
617 colored line) and iATS frequency (lighter colored line) from panels 3G-I. See original panels for y-axis data ranges.

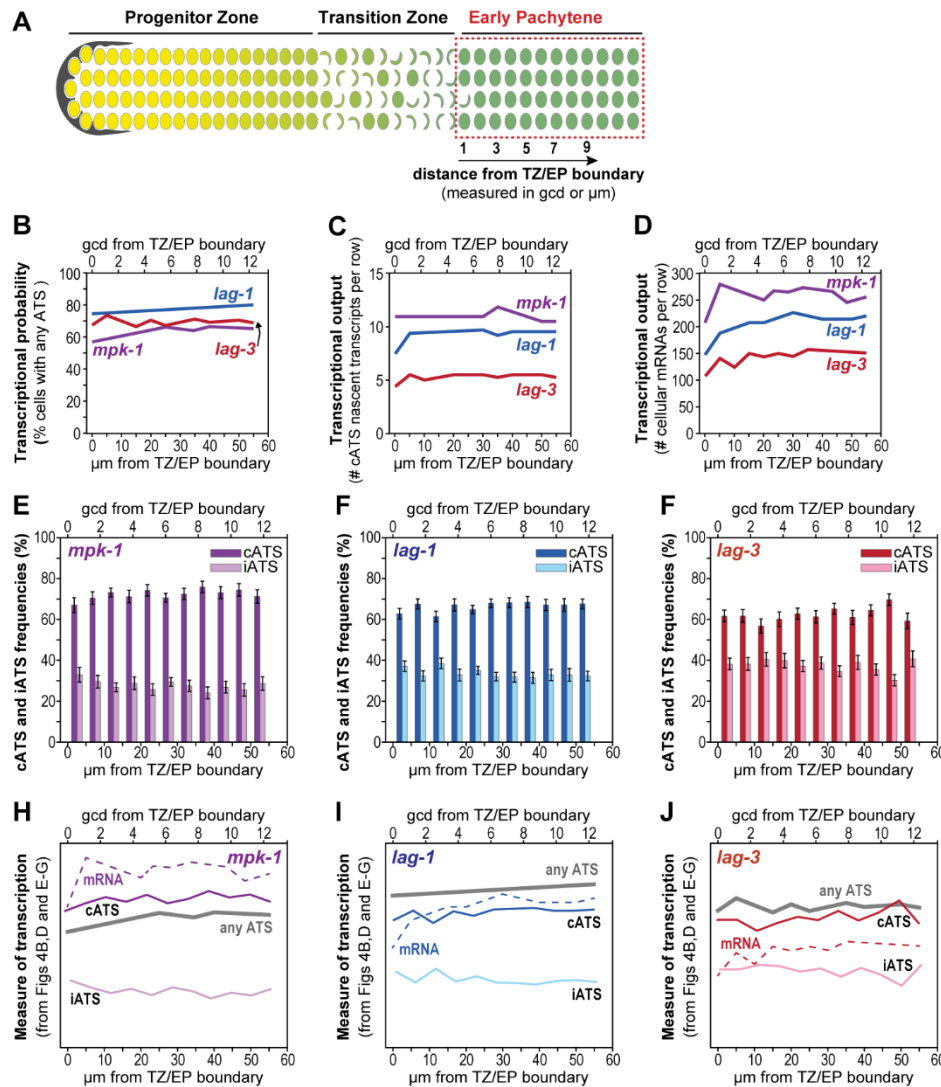

618  
619

620 **Figure 4: Transcription of *mpk-1*, *lag-1* and *lag-3* in the Early Pachytene region.** **A.** Gonadal region scored in this  
621 figure (dashed red box) extends 12 gcd into the early pachytene region (EP) from the TZ/EP boundary. Numbers  
622 mark position or cell row, measured in gcd and starting at the TZ/EP boundary; MATLAB scores position in  $\mu\text{m}$  from  
623 the same boundary with each gcd averaging  $\sim 4.4 \mu\text{m}$  in this region. See Figure S7 for smFISH images. **B-J.**  
624 Quantification of transcripts as a function of position, per cell row. Number of gonads analyzed for each gene:  
625 *mpk-1*,  $n = 36$ ; *lag-1*,  $n = 36$ ; and *lag-3*,  $n = 37$ . x-axis represents cell position as gcd (top) and  $\mu\text{m}$  (bottom) from the  
626 TZ/EP boundary. **B.** Percent cells with one or more ATS, either cATS or iATS. Total cell number scored: *mpk-1*,  $n =$   
627  $6249$ ; *lag-1*,  $n = 6064$ ; and *lag-3*,  $n = 4625$ . Line plots from data in Figure S8(A-C). **C.** Transcriptional output  
628 measured as total nascent transcripts at cATS per cell row (see text and Methods). Line plots from data in Figure  
629 S8(G-I). **D.** Transcriptional output measured as total number of mRNAs in cells per row; mRNAs in rachis were  
630 excluded. Cells were defined as described in Figure 2D. Line plots from data in Figure S8(J-L). Data for number of  
631 mRNA per cell in Figure S8(M-O). **E-G.** iATS and cATS frequencies as a function of position. Bars show percentages  
632 of total ATS that are cATS (darker bars) or iATS (lighter bars). Total number of ATS (either cATS or iATS) scored:  
633 *mpk-1*,  $n = 5749$ ; *lag-1*,  $n = 10118$ ; and *lag-3*,  $n = 4730$ . **H-J.** Measures of transcription taken from panels above  
634 and combined to highlight patterns; individual lines represent quite different measures and specific values are  
635 therefore not comparable. Transcriptional probability (gray line) from 4B. Number of mRNA in cells (dashed  
636 colored line) from 4D. The cATS frequency (dark colored line) and iATS frequency (lighter colored line) from data in  
637 4E-G. See original panels for y-axis data ranges.

638

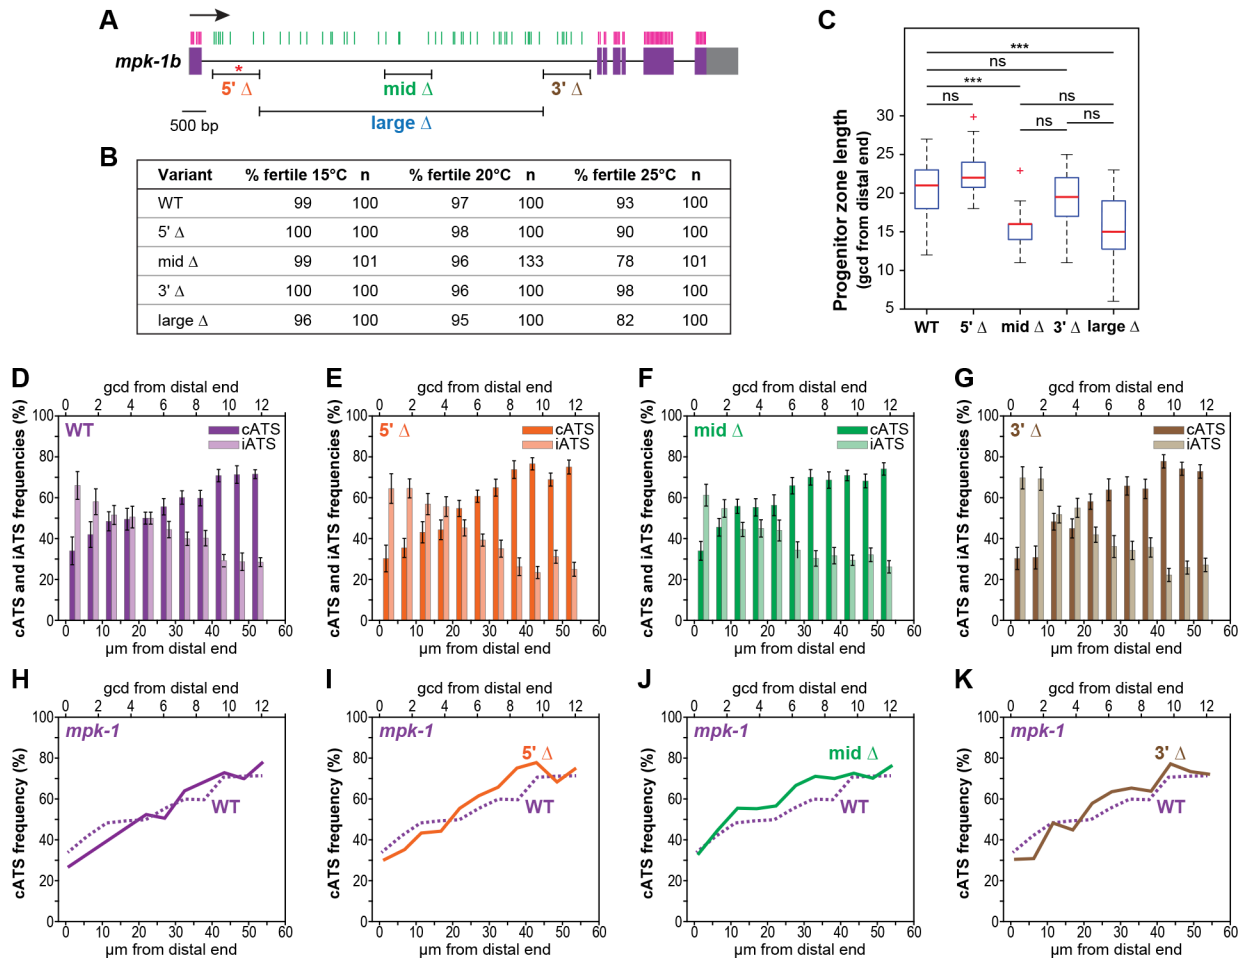

639  
640

641 **Figure 5: *mpk-1* intron deletion mutants and their effects.** **A.** CRISPR-induced deletions in large first intron of the  
642 endogenous *mpk-1* locus. Conventions as in Figure 1. Barred lines show extent, position, and name of each  
643 deletion. Each smaller deletion is ~1 kb and the large Δ is ~ 5.7 kb. Red asterisk marks site of 90 bp motif removed  
644 by the 5' Δ. **B.** Effects of intron deletions on fertility. Mutants were scored for production of embryos at 15°C,  
645 20°C, and 25°C. **C.** Effects of intron deletions on Progenitor Zone length, scored as number of gcd from the distal  
646 end to formation of DAPI-stained crescents marking entry into meiotic prophase, by convention. Number PZs  
647 counted: WT, n = 22; 5' Δ, n = 26; mid Δ, n = 12; 3' Δ, n = 16; large Δ, n = 21. Student's t-test determined statistical  
648 significance. \*\*\*, p < 0.00001. **D-K.** iATS and cATS frequencies as a function of position in the Progenitor Zone  
649 (dashed red box in Figure 2A). Mutants and wildtype were grown and assayed in parallel under the same  
650 conditions; number of individual probe binding sites removed was roughly equivalent for all three small deletions  
651 (Table S1). Extended intron data in Figure S9. Number gonads scored: wildtype, n = 16; 5' Δ, n = 19; mid Δ, n = 20;  
652 and 3' Δ, n = 19. **D-G.** Bars show percentages of total ATS that are cATS (darker bars) or iATS (lighter bars) as  
653 a function of position. Total number ATS scored: wildtype, n = 2334; 5' Δ, n = 2305; mid Δ, n = 3086; and 3' Δ, n =  
654 2355. **H.** cATS frequency in wildtype control done in parallel with mutants (dashed purple line) compared to cATS  
655 frequency in wild-type from Figure 3 (solid purple line). **I-K.** cATS frequency of each mutant (solid line) compared  
656 to wildtype control (dashed purple line).  
657



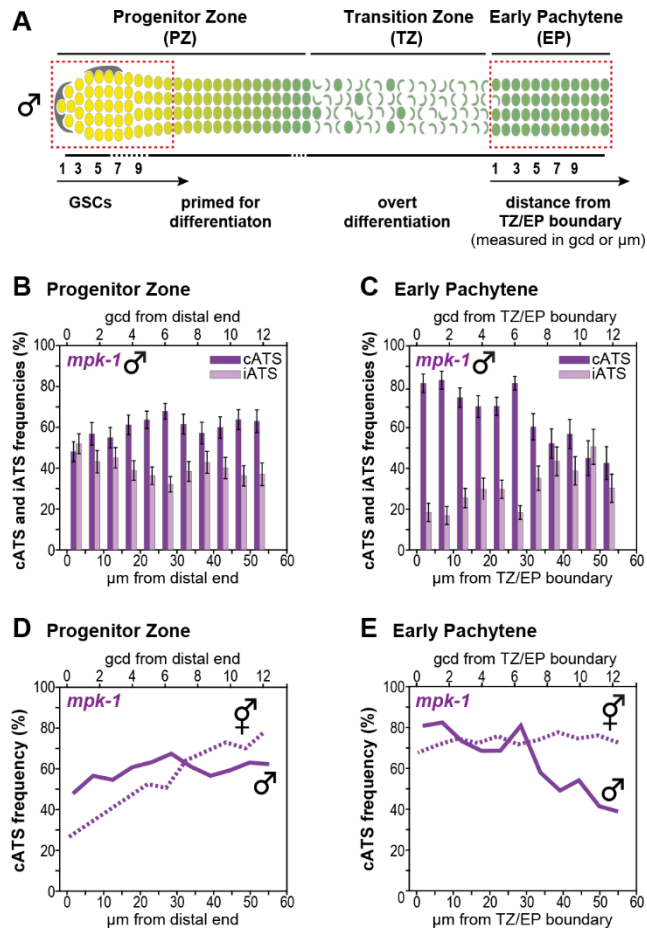

658

659 **Figure 6: *mpk-1* ATS pattern in males.** **A.** Male germline architecture. Males have two somatic niche cells (gray).  
 660 Male progenitor and transition zones are longer than in hermaphrodite (Morgan et al., 2010), but male GSC pool  
 661 sizes are similar in the two sexes (Crittenden et al., 2019). Red boxes, regions analyzed by smFISH, the first 12 cell  
 662 rows of the PZ and the first 12 cell rows of early pachytene (EP) region. **B & D.** PZ data, conventions as in Figure 3.  
 663 Number of gonads,  $n = 24$ . **C & E.** EP data, conventions as in Figure 4. Number of gonads,  $n = 22$ . **B & C.** iATS and  
 664 cATS frequencies as a function of position in the PZ (B) and EP (C). Bars show percentages of total ATS that are  
 665 cATS (darker bars) or iATS (lighter bars). Total number of ATS scored in PZ = 2195, and in EP = 1350. **D & E.** Male  
 666 *mpk-1* cATS frequency (solid purple) compared to hermaphrodite cATS frequency (dashed purple) in the PZ (D) and  
 667 EP (E). Hermaphrodite data taken from Figure 3J for PZ and Figure 4H for the EP.

668

669

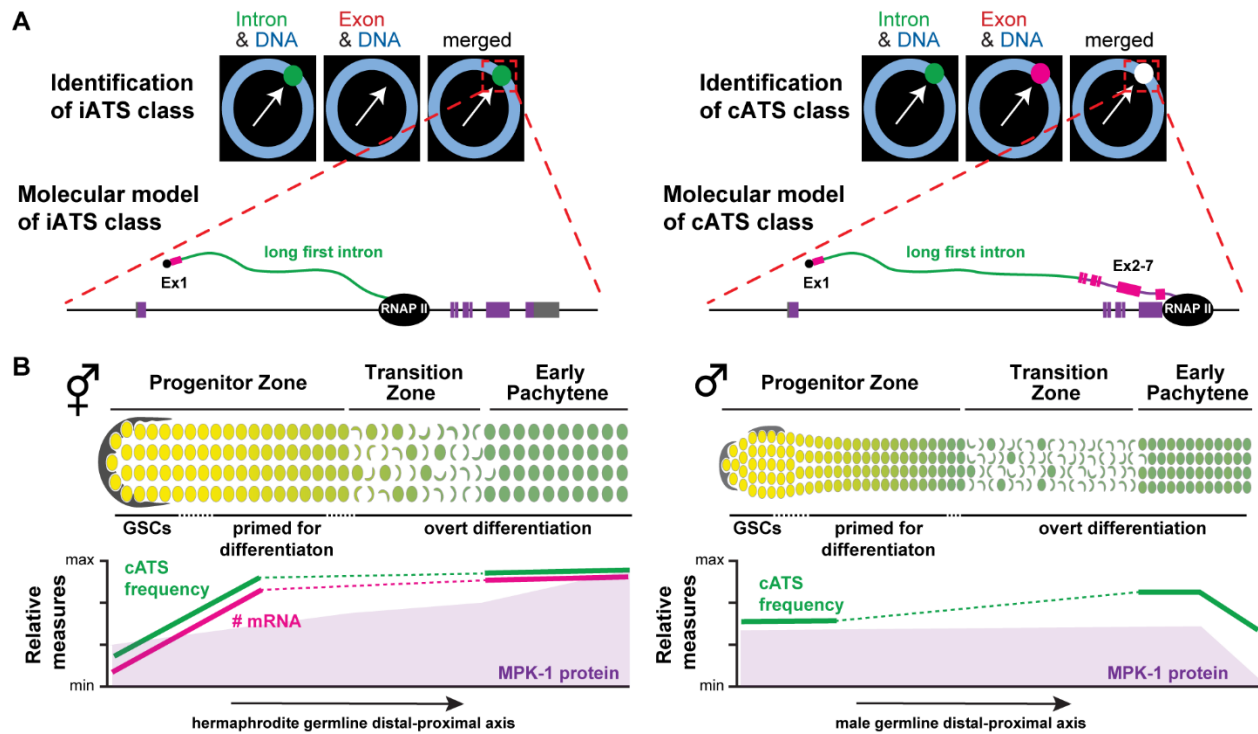

670

671 **Figure 7: Models for ATS class regulation in development.** **A.** Molecular model of iATS, left, and cATS, right.  
 672 Above left, iATS hybridize uniquely to intron probe set; above right, cATS hybridize to both intron and exon probe  
 673 sets. Below left, nascent transcripts at iATS are proposed to consist of the first exon (Ex1) plus much of the long  
 674 first intron, but not more downstream exons (Ex2-7). Below right, nascent transcripts at cATS are proposed to  
 675 include both the first exon, the long first intron and downstream exons. See Discussion for possible mechanisms  
 676 that may be regulated to create these two ATS classes. **B.** Models for developmental effects of *mpk-1* ATS class  
 677 regulation. Above, hermaphrodite (left) and male (right) gonads, using conventions as in Figure 1A. Below,  
 678 patterns of *mpk-1* ATS class frequency and *mpk-1* gene expression. Patterns of cATS frequency and mRNA numbers  
 679 are from this work (solid lines, dashed lines are extrapolated); patterns of MPK-1 protein abundance (purple  
 680 shading) was reported earlier (Min Ho Lee et al., 2007). See Discussion for biological relevance of sexually  
 681 dimorphic ATS class patterns.

682

683

684 **References:**

- 685 Adelman K, Lis JT. 2012. Promoter-proximal pausing of RNA polymerase II: emerging roles in  
686 metazoans. *Nat Rev Genet*. doi:10.1038/nrg3293
- 687 Ahringer J (ed. . 2006. Reverse genetics. *WormBook*. doi:10.1895/wormbook.1.47.1
- 688 Albert Hubbard EJ, Schedl T. 2019. Biology of the caenorhabditis elegans germline stem cell  
689 system. *Genetics* **213**:1145–1188. doi:10.1534/genetics.119.300238
- 690 Alexander RD, Innocente SA, Barrass JD, Beggs JD. 2010. Splicing-Dependent RNA  
691 polymerase pausing in yeast. *Mol Cell* **40**:582–593. doi:10.1016/j.molcel.2010.11.005
- 692 Alpert T, Herzelt L, Neugebauer KM. 2017. Perfect timing: splicing and transcription rates in  
693 living cells. *Wiley Interdiscip Rev RNA*. doi:10.1002/wrna.1401
- 694 Arur S, Ohmachi M, Berkseth M, Nayak S, Hansen D, Zarkower D, Schedl T. 2011. MPK-1  
695 ERK controls membrane organization in *C. elegans* oogenesis via a sex-determination  
696 module. *Dev Cell* **20**:677–688. doi:10.1016/j.devcel.2011.04.009
- 697 Bartman CR, Hamagami N, Keller CA, Giardine B, Hardison RC, Blobel GA, Raj A. 2019.  
698 Transcriptional Burst Initiation and Polymerase Pause Release Are Key Control Points of  
699 Transcriptional Regulation. *Mol Cell* **73**:519–532.e4. doi:10.1016/j.molcel.2018.11.004
- 700 Bender TP, Thompson CB, Kuehl WM. 1987. Differential expression of c-myc mRNA in murine B  
701 lymphomas by a block to transcription elongation. *Science (80- )* **237**:1473–1476.  
702 doi:10.1126/science.3498214
- 703 Brenner S. 1974. The genetics of *Caenorhabditis elegans*. *Genetics* **77**:71–94.
- 704 Chen J, Mohammad A, Pazdernik N, Huang H, Bowman B, Tycksen E, Schedl T. 2020. GLP-1  
705 Notch—LAG-1 CSL control of the germline stem cell fate is mediated by transcriptional  
706 targets *lst-1* and *sygl-1*. *PLOS Genet* **16**:e1008650. doi:10.1371/journal.pgen.1008650
- 707 Chorev M, Carmel L. 2012. The Function of Introns. *Front Genet* **3**:55.  
708 doi:10.3389/fgene.2012.00055
- 709 Christensen S, Kodoyianni V, Bosenberg M, Friedman L, Kimble J. 1996. *lag-1*, a gene required  
710 for *lin-12* and *glp-1* signaling in *Caenorhabditis elegans*, is homologous to human CBF1  
711 and *Drosophila* Su(H). *Development* **122**:1373–1383.
- 712 Chubb JR, Trcek T, Shenoy SM, Singer RH. 2006. Transcriptional pulsing of a developmental  
713 gene. *Curr Biol* **16**:1018–1025. doi:10.1016/j.cub.2006.03.092
- 714 Church DL, Guan KL, Lambie EJ. 1995. Three genes of the MAP kinase cascade, *mek-2*, *mpk-*  
715 *1/sur-1* and *let-60 ras*, are required for meiotic cell cycle progression in *Caenorhabditis*  
716 *elegans*. *Development* **121**:2525–2535.
- 717 Churchman LS, Weissman JS. 2011. Nascent transcript sequencing visualizes transcription at  
718 nucleotide resolution. *Nature* **469**:368–373. doi:10.1038/nature09652
- 719 Cinghu S, Yang P, Kosak JP, Conway AE, Kumar D, Oldfield AJ, Adelman K, Jothi R. 2017.  
720 Intragenic Enhancers Attenuate Host Gene Expression. *Mol Cell* **68**:104–117.e6.  
721 doi:10.1016/j.molcel.2017.09.010
- 722 Cinquin O, Crittenden SL, Morgan DE, Kimble J. 2010. Progression from a stem cell-like state  
723 to early differentiation in the *C. elegans* germ line. *Proc Natl Acad Sci U S A* **107**:2048–  
724 2053. doi:10.1073/pnas.0912704107
- 725 Clement JQ, Qian L, Kaplinsky N, Wilkinson MF. 1999. The stability and fate of a spliced intron  
726 from vertebrate cells. *RNA* **5**:206–220. doi:10.1017/S1355838299981190
- 727 Coté A, Coté C, Bayatpour S, Drexler HL, Alexander KA, Chen F, Wassie AT, Boyden ES,  
728 Berger S, Churchman LS, Raj A. 2020. The spatial distributions of pre-mRNAs suggest  
729 post-transcriptional splicing of specific introns within endogenous genes. *bioRxiv*

- 2020.04.06.028092. doi:10.1101/2020.04.06.028092
- 731 Crittenden SL, Lee C, Mohanty I, Battula S, Knobel K, Kimble J. 2019. Sexual dimorphism of  
732 niche architecture and regulation of the *Caenorhabditis elegans* germline stem cell pool.  
733 *Mol Biol Cell* **30**:1757–1769. doi:10.1091/mbc.E19-03-0164
- 734 Crittenden SL, Leonhard KA, Byrd DT, Kimble J. 2006. Cellular analyses of the mitotic region  
735 in the *Caenorhabditis elegans* adult germ line. *Mol Biol Cell* **17**:3051–3061.  
736 doi:10.1091/mbc.E06-03-0170
- 737 Crittenden SL, Troemel ER, Evans TC, Kimble J. 1994. GLP-1 is localized to the mitotic region  
738 of the *C. elegans* germ line. *Development* **120**:2901–2911.
- 739 Daguinet E, Baguet A, Degot S, Schmidt U, Alpy F, Wendling C, Spiegelhalter C, Kessler P,  
740 Rio MC, Hir H Le, Bertrand E, Tomasetto C. 2012. Perispeckles are major assembly sites  
741 for the exon junction core complex. *Mol Biol Cell* **23**:1765–1782. doi:10.1091/mbc.E12-01-  
742 0040
- 743 Darzacq X, Shav-Tal Y, De Turris V, Brody Y, Shenoy SM, Phair RD, Singer RH. 2007. In vivo  
744 dynamics of RNA polymerase II transcription. *Nat Struct Mol Biol* **14**:796–806.  
745 doi:10.1038/nsmb1280
- 746 Dias AP, Dufu K, Lei H, Reed R. 2010. A role for TREX components in the release of spliced  
747 mRNA from nuclear speckle domains. *Nat Commun* **1**:1–10. doi:10.1038/ncomms1103
- 748 Dokshin GA, Ghanta KS, Piscopo KM, Mello CC. 2018. Robust Genome Editing With Short  
749 Single-Stranded and Long, Partially Single-Stranded DNA Donors in  
750 *Caenorhabditiselegans*. *Genetics*. doi:10.1534/genetics.118.301532
- 751 Femino AM, Fay FS, Fogarty K, Singer RH. 1998. Visualization of single RNA transcripts in  
752 situ. *Science (80- )* **280**:585–590. doi:10.1126/science.280.5363.585
- 753 Forghanifard MM, Moaven O, Farshchian M, Montazer M, Raeisossadati R, Abdollahi A,  
754 Moghbeli M, Nejadshattari T, Parivar K, Abbaszadegan MR. 2012. Expression analysis  
755 elucidates the roles of MAML1 and Twist1 in esophageal squamous cell carcinoma  
756 aggressiveness and metastasis. *Ann Surg Oncol* **19**:743–749. doi:10.1245/s10434-011-2074-  
757 8
- 758 Galganski L, Urbanek MO, Krzyzosiak WJ. 2017. SURVEY AND SUMMARY Nuclear  
759 speckles: molecular organization, biological function and role in disease. *Nucleic Acids Res*  
760 **45**:10350–10368. doi:10.1093/nar/gkx759
- 761 Gubb D. 1986. Intron-delay and the precision of expression of homoeotic gene products in  
762 *Drosophila*. *Dev Genet* **7**:119–131. doi:10.1002/dvg.1020070302
- 763 Haupt KA, Law KT, Enright AL, Kanzler CR, Shin H, Wickens M, Kimble J. 2019. A PUF Hub  
764 Drives Self-Renewal in *Caenorhabditis elegans* Germline Stem Cells. *Genetics*.  
765 doi:10.1534/genetics.119.302772
- 766 Ji N, van Oudenaarden A. 2012. Single molecule fluorescent in situ hybridization (smFISH) of  
767 *C. elegans* worms and embryos. *WormBook*. doi:10.1895/wormbook.1.153.1
- 768 Jonkers I, Lis JT. 2015. Getting up to speed with transcription elongation by RNA polymerase II.  
769 *Nat Rev Mol Cell Biol*. doi:10.1038/nrm3953
- 770 Kershner AM, Shin H, Hansen TJ, Kimble J. 2014. Discovery of two GLP-1/Notch target genes  
771 that account for the role of GLP-1/Notch signaling in stem cell maintenance. *Proc Natl*  
772 *Acad Sci U S A* **111**:3739–3744. doi:10.1073/pnas.1401861111
- 773 Kitagawa M. 2015. Notch signalling in the nucleus: Roles of Mastermind-like (MAML)  
774 transcriptional coactivators. *J Biochem*. doi:10.1093/jb/mvv123
- 775 Kwasnieski JC, Orr-Weaver TL, Bartel DP. 2019. Early genome activation in *Drosophila* is

- 776 extensive with an initial tendency for aborted transcripts and retained introns. *Genome Res*  
777 **29**:1188–1197. doi:10.1101/gr.242164.118
- 778 Lackner MR, Kornfeld K, Miller LM, Robert Horvitz H, Kim SK. 1994. A MAP kinase  
779 homolog, mpk-1, is involved in ras-mediated induction of vulval cell fates in  
780 *Caenorhabditis elegans*. *Genes Dev* **8**:160–173. doi:10.1101/gad.8.2.160
- 781 Lambie EJ, Kimble J. 1991. Two homologous regulatory genes, lin-12 and glp-1, have  
782 overlapping functions. *Development* **112**:231–240.
- 783 Lee C, Seidel HS, Lynch TR, Sorensen EB, Crittenden SL, Kimble J. 2017. Single-molecule  
784 RNA fluorescence in situ hybridization (smFISH) in *Caenorhabditis elegans*. *Bio-protocol*  
785 **7**:e2357. doi:10.21769/BioProtoc.2357
- 786 Lee C, Shin H, Kimble J. 2019. Dynamics of Notch-dependent transcriptional bursting in its  
787 native context. *Dev Cell in press*. doi:10.1016/j.devcel.2019.07.001
- 788 Lee C, Sorensen EB, Lynch TR, Kimble J. 2016. *C. elegans* GLP-1/Notch activates transcription  
789 in a probability gradient across the germline stem cell pool. *Elife* **5**:e18370.  
790 doi:10.7554/elife.18370
- 791 Lee Myon Hee, Hook B, Pan G, Kershner AM, Merritt C, Seydoux G, Thomson JA, Wickens M,  
792 Kimble J. 2007. Conserved regulation of MAP kinase expression by PUF RNA-binding  
793 proteins. *PLoS Genet* **3**:2540–2550. doi:10.1371/journal.pgen.0030233
- 794 Lee Min Ho, Ohmachi M, Arur S, Nayak S, Francis R, Church D, Lambie E, Schedl T. 2007.  
795 Multiple functions and dynamic activation of MPK-1 extracellular signal-regulated kinase  
796 signaling in *Caenorhabditis elegans* germline development. *Genetics* **177**:2039–2062.  
797 doi:10.1534/genetics.107.081356
- 798 Liu T, Rechtsteiner A, Egelhofer TA, Vielle A, Latorre I, Cheung MS, Ercan S, Ikegami K,  
799 Jensen M, Kolasinska-Zwierz P, Rosenbaum H, Shin H, Taing S, Takasaki T, Iniguez AL,  
800 Desai A, Dernburg AF, Kimura H, Lieb JD, Ahringer J, Strome S, Liu XS. 2011. Broad  
801 chromosomal domains of histone modification patterns in *C. elegans*. *Genome Res* **21**:227–  
802 236. doi:10.1101/gr.115519.110
- 803 Lopez 3rd AL, Chen J, Joo HJ, Drake M, Shidate M, Kseib C, Arur S. 2013. DAF-2 and ERK  
804 couple nutrient availability to meiotic progression during *Caenorhabditis elegans* oogenesis.  
805 *Dev Cell* **27**:227–240. doi:10.1016/j.devcel.2013.09.008
- 806 Mannervik M, Nibu Y, Zhang H, Levine M. 1999. Transcriptional coregulators in development.  
807 *Science (80- )* **284**:606–609.
- 808 Martin RM, Rino J, Carvalho C, Kirchhausen T, Carmo-Fonseca M. 2013. Live-Cell  
809 Visualization of Pre-mRNA Splicing with Single-Molecule Sensitivity. *Cell Rep* **4**:1144–  
810 1155. doi:10.1016/j.celrep.2013.08.013
- 811 Mayer A, Di Iulio J, Maleri S, Eser U, Vierstra J, Reynolds A, Sandstrom R,  
812 Stamatoyannopoulos JA, Churchman LS. 2015. Native elongating transcript sequencing  
813 reveals human transcriptional activity at nucleotide resolution. *Cell* **161**:541–554.  
814 doi:10.1016/j.cell.2015.03.010
- 815 McElhinny AS, Li JL, Wu L. 2008. Mastermind-like transcriptional co-activators: Emerging  
816 roles in regulating cross talk among multiple signaling pathways. *Oncogene*.  
817 doi:10.1038/onc.2008.228
- 818 Mcknight SL, Miller OL. 1976. Ultrastructural Patterns of RNA Synthesis during Early  
819 Embryogenesis of *Drosophila melanogaster*, *Cell*.
- 820 Morgan CT, Noble D, Kimble J. 2013. Mitosis-meiosis and sperm-oocyte fate decisions are  
821 separable regulatory events. *Proc Natl Acad Sci U S A* **110**:3411–3416.



- 822       doi:10.1073/pnas.1300928110  
823 Morgan DE, Crittenden SL, Kimble J. 2010. The *C. elegans* adult male germline: Stem cells and  
824 sexual dimorphism. *Dev Biol* **346**:204–214. doi:10.1016/j.ydbio.2010.07.022  
825 Nojima T, Gomes T, Grosso ARF, Kimura H, Dye MJ, Dhir S, Carmo-Fonseca M, Proudfoot  
826 NJ. 2015. Mammalian NET-seq reveals genome-wide nascent transcription coupled to RNA  
827 processing. *Cell* **161**:526–540. doi:10.1016/j.cell.2015.03.027  
828 Paix A, Wang Y, Smith HE, Lee CY, Calidas D, Lu T, Smith J, Schmidt H, Krause MW,  
829 Seydoux G. 2014. Scalable and versatile genome editing using linear DNAs with  
830 microhomology to Cas9 Sites in *Caenorhabditis elegans*. *Genetics* **198**:1347–1356.  
831 doi:10.1534/genetics.114.170423  
832 Parenteau J, Maignon L, Berthoumieux M, Catala M, Gagnon V, Abou Elela S. 2019. Introns are  
833 mediators of cell response to starvation. *Nature* **565**:612–617. doi:10.1038/s41586-018-  
834 0859-7  
835 Pereira LA, Hugo HJ, Malaterre J, Huiling X, Sonza S, Cures A, J Purcell DF, Ramsland PA,  
836 Gerondakis S, Gonda TJ, Ramsay RG. 2015. MYB Elongation Is Regulated by the Nucleic  
837 Acid Binding of NFκB p50 to the Intronic Stem-Loop Region.  
838 doi:10.1371/journal.pone.0122919  
839 Petcherski AG, Kimble J. 2000. LAG-3 is a putative transcriptional activator in the *C. elegans*  
840 Notch pathway. *Nature* **405**:364–368. doi:10.1038/35012645  
841 Pichon X, Lagha M, Mueller F, Bertrand E. 2018. A Growing Toolbox to Image Gene  
842 Expression in Single Cells: Sensitive Approaches for Demanding Challenges. *Mol Cell*.  
843 doi:10.1016/j.molcel.2018.07.022  
844 Priess JR. 2005. Notch signaling in the *C. elegans* embryo. *WormBook*.  
845 doi:10.1895/wormbook.1.4.1  
846 Rose AB. 2019. Introns as gene regulators: A brick on the accelerator. *Front Genet*.  
847 doi:10.3389/fgene.2018.00672  
848 Rosu S, Cohen-Fix O. 2017. Live-imaging analysis of germ cell proliferation in the *C. elegans*  
849 adult supports a stochastic model for stem cell proliferation. *Dev Biol* **423**:93–100.  
850 doi:10.1016/j.ydbio.2017.02.008  
851 Saldi T, Cortazar MA, Sheridan RM, Bentley DL. 2016. Coupling of RNA Polymerase II  
852 Transcription Elongation with Pre-mRNA Splicing. *J Mol Biol*.  
853 doi:10.1016/j.jmb.2016.04.017  
854 Sheridan RM, Fong N, D’Alessandro A, Bentley DL. 2018. Widespread Backtracking by RNA  
855 Pol II Is a Major Effector of Gene Activation, 5’ Pause Release, Termination, and  
856 Transcription Elongation Rate. *Mol Cell*. doi:10.1016/j.molcel.2018.10.031  
857 Shermoen AW, O’Farrell PH. 1991. Progression of the cell cycle through mitosis leads to  
858 abortion of nascent transcripts. *Cell* **67**:303–310. doi:10.1016/0092-8674(91)90182-x  
859 Singh J, Padgett RA. 2009. Rates of in situ transcription and splicing in large human genes. *Nat*  
860 *Struct Mol Biol* **16**:1128–1133. doi:10.1038/nsmb.1666  
861 Sorensen EB, Seidel HS, Crittenden SL, Ballard JH, Kimble J. 2020. A toolkit of tagged glp-1  
862 alleles reveals strong glp-1 expression in the germline, embryo, and spermatheca.  
863 Sternberg PW. 2005. Vulval development. *WormBook*. doi:doi/10.1895/wormbook.1.6.1  
864 Stoeckius M, Grün D, Kirchner M, Ayoub S, Torti F, Piano F, Herzog M, Selbach M, Rajewsky  
865 N. 2014. Global characterization of the oocyte-to-embryo transition in *C aenorhabditis*  
866 *elegans* uncovers a novel m RNA clearance mechanism . *EMBO J* **33**:1751–1766.  
867 doi:10.15252/embj.201488769

- 868 Swinburne IA, Miguez DG, Landgraf D, Silver PA. 2008. Intron length increases oscillatory  
869 periods of gene expression in animal cells. *Genes Dev* **22**:2342–2346.  
870 doi:10.1101/gad.1696108
- 871 Swinburne IA, Silver PA. 2008. Intron Delays and Transcriptional Timing during Development.  
872 *Dev Cell* **14**:324–330. doi:10.1016/j.devcel.2008.02.002
- 873 Tadros W, Lipshitz HD. 2009. The maternal-to-zygotic transition: A play in two acts.  
874 *Development* **136**:3033–3042. doi:10.1242/dev.033183
- 875 Takashima Y, Ohtsuka T, González A, Miyachi H, Kageyama R. 2011. Intronic delay is essential  
876 for oscillatory expression in the segmentation clock. *Proc Natl Acad Sci U S A* **108**:3300–  
877 3305. doi:10.1073/pnas.1014418108
- 878 Wolke U, Jezuit EA, Priess JR. 2007. Actin-dependent cytoplasmic streaming in *C. elegans*  
879 oogenesis. *Development* **134**:2227–2236. doi:10.1242/dev.004952
- 880 Wu L, Griffin JD. 2004. Modulation of Notch signaling by mastermind-like (MAML)  
881 transcriptional co-activators and their involvement in tumorigenesis. *Semin Cancer Biol*  
882 **14**:348–356. doi:10.1016/j.semcancer.2004.04.014
- 883 Wu Y, Han M. 1994. Suppression of activated let-60 ras protein defines a role of *Caenorhabditis*  
884 *elegans* sur-1 MAP kinase in vulval differentiation. *Genes Dev* **8**:147–159.  
885 doi:10.1101/gad.8.2.147
- 886 Yoon DS, Alfhili MA, Friend K, Lee M-H. 2017. MPK-1/ERK regulatory network controls the  
887 number of sperm by regulating timing of sperm-oocyte switch in *C. elegans* germline.  
888 *Biochem Biophys Res Commun* **491**:1077–1082. doi:10.1016/j.bbrc.2017.08.014
- 889 Zhao Y, Katzman RB, Delmolino LM, Bhat I, Zhang Y, Gurumurthy CB, Germaniuk-Kurowska  
890 A, Reddi H V., Solomon A, Zeng M-S, Kung A, Ma H, Gao Q, Dimri G, Stanculescu A,  
891 Miele L, Wu L, Griffin JD, Wazer DE, Band H, Band V. 2007. The Notch Regulator  
892 MAML1 Interacts with p53 and Functions as a Coactivator. *J Biol Chem* **282**:11969–11981.  
893 doi:10.1074/jbc.M608974200  
894
